# Supplementary material for: Potential urinary volatile organic compounds as screening markers in cancer – a review
Source: Front Oncol. 2024 Nov 25;14:1448760. doi: 10.3389/fonc.2024.1448760 (PMC11626232; doi:10.3389/fonc.2024.1448760)
Supplement: Supplementary Table S1 — Complete list of volatile organic compounds significantly linked with cancer. [file Table1.xlsx]

## Sheet: Supplementary Table S1
Volatile organic compound (VOC) linked to cancer	Cas #	Atomic formula	Compounds descriptor	Cancer type	Change in concentration relative to controls	Selection criteria	Reference	Full reference title	Calculated atomic weight
formaldehyde	50-00-0	CH2O	Aldehyde	Bladder	Downregulated	Compounds identified as signfiicantly altered in patients	Pinto et al., 2021	Discovery of Volatile Biomarkers for Bladder Cancer Detection and Staging through Urine Metabolomics	30.0257
prop-2-enal	107-02-8	C3H4O	Aldehyde	Breast	Increased 2.0 fold	Compounds identified as differential metabolites between cancer and health urine	Yang et al., 2023	Rapid Detection of Volatile Organic Metabolites in Urine by High-Pressure Photoionization Mass Spectrometry for Breast Cancer Screening: A Pilot Study	56.0634
propan-2-one	540-92-1	C3H6O	Ketone	Lung	Increased 1.382 fold	Identified as significant in model of cancer mortality	Chapman et al., 2023	GC-MS Techniques Investigating Potential Biomarkers of Dying in the Last Weeks with Lung Cancer	58.079
propan-2-one	67-64-1	C3H6O	Ketone	Bladder		Compound identified by authors in sample and used in model	Lett et al., 2022	Investigation of urinary volatile organic compounds as novel diagnostic and surveillance biomarkers of bladder cancer	58.079
acetic acid	64-19-7	C2H4O2	Carboxylic Acid	Prostate		Compounds identified as possibile biomarkers of prostate cancer	Tyagi et al., 2021	Urinary Volatiles and Chemical Characterisation for the Non-Invasive Detection of Prostate and Bladder Cancers	60.0514
pyrrole	109-97-7	C4H5N	Heterocyclic	Lung	Not significantly different	Used in study based on previous research	Perez Anton et al., 2016	Headspace-programmed temperature vaporization-mass spectrometry for the rapid determination of possible volatile biomarkers of lung cancer in urine	67.0902
pyrrole	109-97-7	C4H5N	Heterocyclic	Prostate		Compounds identified as possibile biomarkers of prostate cancer	Tyagi et al., 2021	Urinary Volatiles and Chemical Characterisation for the Non-Invasive Detection of Prostate and Bladder Cancers	67.0902
2-oxopropanal	79-98-8	C3H4O2	Aldehyde, Ketone	Prostate		Compounds previously identified in biomarker study for Pca only to complete model	Lima et al., 2020	A Panel of Urinary Volatile Biomarkers for Differential Diagnosis of Prostate Cancer from Other Urological Cancers	72.0624
butan-2-one	78-93-3	C4H8O	Ketone	Breast		Identified as significant in model of breast cancer and Pitavastatin treatment	Grocki et al., 2022	Chemometric Analysis of Urinary Volatile Organic Compounds to Monitor the Efficacy of Pitavastatin Treatments on Mammary Tumor Progression over Time	72.1057
oxolane	109-99-9	C4H8O	Heterocyclic	Lung	Increased	Identified as statistically increased in cancer group	Hanai et al., 2012	Urinary Volatile Compounds as Biomarkers for Lung Cancer	72.1057
butan-2-one	78-93-3	C4H8O	Ketone	Lung	Significantly increased	Used in study based on previous research	Perez Anton et al., 2016	Headspace-programmed temperature vaporization-mass spectrometry for the rapid determination of possible volatile biomarkers of lung cancer in urine	72.1057
butan-2-one	78-93-3	C4H8O	Ketone	Bladder	Downregulated	Compounds identified as signfiicantly altered in patients	Pinto et al., 2021	Discovery of Volatile Biomarkers for Bladder Cancer Detection and Staging through Urine Metabolomics	72.1057
butan-2-one	78-93-3	C4H8O	Ketone	Breast		Compounds identified as significantly different between early stage (week 1) and later stage (week 3) cancer	Woollam et al., 2023	Tracking the Progression of Triple Negative Mammary Tumors over Time by Chemometric Analysis of Urinary Volatile Organic Compounds	72.1057
butan-2-one	78-93-3	C4H8O	Ketone	Breast	Increased 1.58-1.92 fold	Compounds identified as differential metabolites between cancer and health urine	Yang et al., 2023	Rapid Detection of Volatile Organic Metabolites in Urine by High-Pressure Photoionization Mass Spectrometry for Breast Cancer Screening: A Pilot Study	72.1057
n,n-dimethylethanamine	598-56-1	C4H11N	Amine	Breast/bone metastisis		Differentially expressed compounds in cancerous mice given pitavastatin treatment	Wang et al., 2019	Pitavastatin slows tumor progression and alters urine-derived volatile organic compounds through the mevalonate pathway	73.1372
pyridine	110-86-1	C5H5N	Heterocyclic	Bladder	Found only in cancer group	Compounds occuring only in cancer group	Ligor et al., 2022	Analysis of VOCs in Urine Samples Directed towards of Bladder Cancer Detection	79.1012
2-chloroethan-1-ol	107-07-3	C2H5ClO	Organohalide	Lung	Increased	Identified as statistically increased in cancer group	Hanai et al., 2012	Urinary Volatile Compounds as Biomarkers for Lung Cancer	80.5132
oxolan-2-one	96-48-0	C4H6O2	Heterocyclic, Ester	Bladder	Increased 7.2 fold	Compounds identified as sigificantly different from control group	Ligor et al., 2022	Analysis of VOCs in Urine Samples Directed towards of Bladder Cancer Detection	86.089
pentan-2-one	107-87-9	C5H10O	Ketone	Pancreatic		Identified as significant in model of Pancreatic Cancer and Pancreatitis	Daulton et al., 2021	Volatile organic compounds (VOCs) for the non-invasive detection of pancreatic cancer from urine	86.1324
pentan-2-one	107-87-9	C5H10O	Ketone	Lung	Increased	Identified as statistically increased in cancer group	Hanai et al., 2012	Urinary Volatile Compounds as Biomarkers for Lung Cancer	86.1324
pentanal	110-62-3	C5H10O	Aldehyde	Prostate	Increased	Identified as significant in model of prostate cancer	Khalid et al., 2015	Urinary Volatile Organic Compounds for the Detection of Prostate Cancer	86.1324
pentan-2-one	107-87-9	C5H10O	Ketone	Bladder	Increased 2.3 fold	Compounds identified as sigificantly different from control group	Ligor et al., 2022	Analysis of VOCs in Urine Samples Directed towards of Bladder Cancer Detection	86.1324
pentan-2-one	107-87-9	C5H10O	Ketone	Lung	Significantly increased	Used in study based on previous research	Perez Anton et al., 2016	Headspace-programmed temperature vaporization-mass spectrometry for the rapid determination of possible volatile biomarkers of lung cancer in urine	86.1324
2-methylbutanal	96-17-3	C5H10O	Aldehyde	Bladder	Downregulated	Compounds identified as signfiicantly altered in patients	Pinto et al., 2021	Discovery of Volatile Biomarkers for Bladder Cancer Detection and Staging through Urine Metabolomics	86.1324
pentanal	110-62-3	C5H10O	Aldehyde	Prostate	Lower attraction	Compounds theorized to be responsible for nematode chemotaxis towards cancer patients	Thompson et al., 2021	Caenorhabditis elegans behavioral assay distinguishes early stage prostate cancer patient urine from controls	86.1324
pentan-2-one	107-87-9	C5H10O	Ketone	Bladder		Compounds identified as possibility biomarkers of bladder cancer	Tyagi et al., 2021	Urinary Volatiles and Chemical Characterisation for the Non-Invasive Detection of Prostate and Bladder Cancers	86.1324
2-methylbut-3-en-2-ol	115-18-4	C5H10O	Alcohol	Breast/bone metastisis		Differentially expressed compounds in cancerous mice given pitavastatin treatment	Wang et al., 2019	Pitavastatin slows tumor progression and alters urine-derived volatile organic compounds through the mevalonate pathway	86.1324
3-methylbutan-2-one	563-80-4	C5H10O	Ketone	Breast/bone metastisis		Differentially expressed compounds in cancerous mice given pitavastatin treatment	Wang et al., 2019	Pitavastatin slows tumor progression and alters urine-derived volatile organic compounds through the mevalonate pathway	86.1324
3-penten-2-ol	3899-34-1	C5H10O	Alcohol	Breast		Compounds identified as significantly different between early stage (week 1) and later stage (week 3) cancer	Woollam et al., 2023	Tracking the Progression of Triple Negative Mammary Tumors over Time by Chemometric Analysis of Urinary Volatile Organic Compounds	86.1324
pentan-2-one	107-87-9	C5H10O	Ketone	Breast	Decreased 0.38-0.56 fold	Compounds identified as differential metabolites between cancer and health urine	Yang et al., 2023	Rapid Detection of Volatile Organic Metabolites in Urine by High-Pressure Photoionization Mass Spectrometry for Breast Cancer Screening: A Pilot Study	86.1324
methyl allyl sulfide	10152-76-8	C4H8S	Organosulfur	Breast	Decreased 0.16 fold	Compounds identified as differential metabolites between cancer and health urine	Yang et al., 2023	Rapid Detection of Volatile Organic Metabolites in Urine by High-Pressure Photoionization Mass Spectrometry for Breast Cancer Screening: A Pilot Study	88.1717
toluene	108-88-3	C7H8	Aromatic	Breast		Identified as significant in model of breast cancer and Pitavastatin treatment	Grocki et al., 2022	Chemometric Analysis of Urinary Volatile Organic Compounds to Monitor the Efficacy of Pitavastatin Treatments on Mammary Tumor Progression over Time	92.1397
toluene	108-88-3	C7H8	Aromatic	Prostate		Compounds identified as possibile biomarkers of prostate cancer	Tyagi et al., 2021	Urinary Volatiles and Chemical Characterisation for the Non-Invasive Detection of Prostate and Bladder Cancers	92.1397
2-bromophenol	95-56-7	C6H5BrO	Organohalide, Phenol	Prostate	More associated with controls	Compound identified as statistically significant between cancer and control groups	Riccio et al., 2023	Differences in the Volatilomic Urinary Biosignature of Prostate Cancer Patients as a Feasibility Study for the Detection of Potential Biomarkers	93.1042
3-methylpyridine	108-99-6	C6H7N	Heterocyclic	Breast	Increased 2.16 fold	Compounds identified as differential metabolites between cancer and health urine	Yang et al., 2023	Rapid Detection of Volatile Organic Metabolites in Urine by High-Pressure Photoionization Mass Spectrometry for Breast Cancer Screening: A Pilot Study	93.1279
phenol	108-95-2	C6H6O	Phenol	Bladder	Increased 1.991 fold	Compound identified by authors in sample and NOT used in model	Lett et al., 2022	Investigation of urinary volatile organic compounds as novel diagnostic and surveillance biomarkers of bladder cancer	94.112
phenol	108-95-2	C6H6O	Phenol	Prostate		Compound identified as statistically significant between cancer and control groups	Riccio et al., 2023	Differences in the Volatilomic Urinary Biosignature of Prostate Cancer Patients as a Feasibility Study for the Detection of Potential Biomarkers	94.112
phenol	108-95-2	C6H6O	Phenol	Prostate		Compounds identified as possibile biomarkers of prostate cancer	Tyagi et al., 2021	Urinary Volatiles and Chemical Characterisation for the Non-Invasive Detection of Prostate and Bladder Cancers	94.112
2-methylpyrazine	109-08-0	C5H6N2	Heterocyclic	Lung	Increased	Identified as statistically increased in cancer group	Hanai et al., 2012	Urinary Volatile Compounds as Biomarkers for Lung Cancer	94.116
disulfide, dimethyl	624-92-0	C2H6S2	Organosulfur	Bladder	Decreased 0.2 fold	Compounds identified as sigificantly different from control group	Ligor et al., 2022	Analysis of VOCs in Urine Samples Directed towards of Bladder Cancer Detection	94.199
disulfide, dimethyl	624-92-0	C2H6S2	Organosulfur	Prostate		Compounds identified as possibile biomarkers of prostate cancer	Tyagi et al., 2021	Urinary Volatiles and Chemical Characterisation for the Non-Invasive Detection of Prostate and Bladder Cancers	94.199
2-furaldehyde	98-01-1'	C5H4O2	Heterocyclic, Aldehyde	Bladder	Downregulated	Compounds identified as signfiicantly altered in patients	Pinto et al., 2021	Discovery of Volatile Biomarkers for Bladder Cancer Detection and Staging through Urine Metabolomics	96.0844
furan-3-methanol	4412-91-3	C5H6O2	Heterocyclic, Alcohol	Prostate	Upregulated	Identified as significant in a model of Prostate cancer by the authors	Liu et al., 2023(b)	Volatile organic compounds for early detection of prostate cancer from urine	98.1
cyclohexanone	108-94-1	C6H10O	Cyclic, Ketone	Lung	Increased	Identified as statistically increased in cancer group	Hanai et al., 2012	Urinary Volatile Compounds as Biomarkers for Lung Cancer	98.1434
cyclohexanone	108-94-1	C6H10O	Cyclic, Ketone	Bladder	Increased 20.4 fold	Compounds identified as sigificantly different from control group	Ligor et al., 2022	Analysis of VOCs in Urine Samples Directed towards of Bladder Cancer Detection	98.1434
cyclopentanone, 2-methyl-	1120-72-5	C6H10O	Cyclic, Ketone	Prostate		Compounds identified as possibile biomarkers of prostate cancer	Tyagi et al., 2021	Urinary Volatiles and Chemical Characterisation for the Non-Invasive Detection of Prostate and Bladder Cancers	98.1434
hexanal	66-25-1	C6H12O	Aldehyde	Bladder		Used in study based on previous research	Bhattacharyya et al., 2022	“Seeing” invisible volatile organic compound (VOC) marker of urinary bladder cancer: A development from bench to bedside prototype spectroscopic device	100.159
2-butanone, 3,3-dimethyl-	75-97-8	C6H12O	Ketone	Breast		Identified as significant in model of breast cancer and Pitavastatin treatment	Grocki et al., 2022	Chemometric Analysis of Urinary Volatile Organic Compounds to Monitor the Efficacy of Pitavastatin Treatments on Mammary Tumor Progression over Time	100.159
hexan-2-one	591-78-6	C6H12O	Ketone	Breast		Identified as significant in model of breast cancer and Pitavastatin treatment	Grocki et al., 2022	Chemometric Analysis of Urinary Volatile Organic Compounds to Monitor the Efficacy of Pitavastatin Treatments on Mammary Tumor Progression over Time	100.159
hexanal	66-25-1	C6H12O	Aldehyde	Prostate		Compounds previously identified in biomarker study for Pca only to complete model	Lima et al., 2020	A Panel of Urinary Volatile Biomarkers for Differential Diagnosis of Prostate Cancer from Other Urological Cancers	100.159
hexanal	66-25-1	C6H12O	Aldehyde	Bladder	Downregulated	Compounds identified as signfiicantly altered in patients	Pinto et al., 2021	Discovery of Volatile Biomarkers for Bladder Cancer Detection and Staging through Urine Metabolomics	100.159
4-methylpentan-2-one	108-10-1	C6H12O	Ketone	Bladder		Compounds identified as possibility biomarkers of bladder cancer	Tyagi et al., 2021	Urinary Volatiles and Chemical Characterisation for the Non-Invasive Detection of Prostate and Bladder Cancers	100.159
2-butanone, 3,3-dimethyl-	75-97-8	C6H12O	Ketone	Breast		Compounds identified as significantly different between early stage (week 1) and later stage (week 3) cancer	Woollam et al., 2023	Tracking the Progression of Triple Negative Mammary Tumors over Time by Chemometric Analysis of Urinary Volatile Organic Compounds	100.159
hexanal	66-25-1	C6H12O	Aldehyde	Bladder		Used in study based on previous research	Zhu et al., 2019	Optical sensory arrays for the detection of urinary bladder cancer-related volatile organic compounds	100.159
benzaldehyde	100-52-7	C7H6O	Aromatic, Aldehyde	Breast		Identified as significant in model of breast cancer and Pitavastatin treatment	Grocki et al., 2022	Chemometric Analysis of Urinary Volatile Organic Compounds to Monitor the Efficacy of Pitavastatin Treatments on Mammary Tumor Progression over Time	106.123
benzaldehyde	100-52-7	C7H6O	Aromatic, Aldehyde	Bladder		Compound identified by authors in sample and used in model	Lett et al., 2022	Investigation of urinary volatile organic compounds as novel diagnostic and surveillance biomarkers of bladder cancer	106.123
ethylbenzene	100-41-4	C8H10	Aromatic	Bladder		Used in study based on previous research	Bhattacharyya et al., 2022	“Seeing” invisible volatile organic compound (VOC) marker of urinary bladder cancer: A development from bench to bedside prototype spectroscopic device	106.166
ethylbenzene	100-41-4	C8H10	Aromatic	Prostate, Bladder, and Renal		Compound found significantly altered in Pca group compared to BC, RC and controls in study	Lima et al., 2020	A Panel of Urinary Volatile Biomarkers for Differential Diagnosis of Prostate Cancer from Other Urological Cancers	106.166
1,4-xylene	106-42-3	C8H10	Aromatic	Prostate and Bladder		Compounds identified as possibile biomarkers for descriminating prostate and bladder cancer	Tyagi et al., 2021	Urinary Volatiles and Chemical Characterisation for the Non-Invasive Detection of Prostate and Bladder Cancers	106.166
ethylbenzene	100-41-4	C8H10	Aromatic	Bladder		Used in study based on previous research	Zhu et al., 2019	Optical sensory arrays for the detection of urinary bladder cancer-related volatile organic compounds	106.166
benzyl alcohol	100-51-6	C7H8O	Aromatic, Alcohol	Bladder	Increased 3.8 fold	Compounds identified as sigificantly different from control group	Ligor et al., 2022	Analysis of VOCs in Urine Samples Directed towards of Bladder Cancer Detection	108.139
4-methylphenol	106-44-5	C7H8O	Phenol	Bladder	Upregulated	Compounds identified as signfiicantly altered in patients	Pinto et al., 2021	Discovery of Volatile Biomarkers for Bladder Cancer Detection and Staging through Urine Metabolomics	108.139
2,3,5-trimethylfuran	10504-04-8	C7H10O	Heterocyclic	Bladder	Found only in cancer group	Compounds occuring only in cancer group	Ligor et al., 2022	Analysis of VOCs in Urine Samples Directed towards of Bladder Cancer Detection	110.154
3-cyclohexene-1-carboxaldehyde	100-50-5	C7H10O	Cyclic, Aldehyde	Breast		Compounds identified as significantly different between early stage (week 1) and later stage (week 3) cancer	Woollam et al., 2023	Tracking the Progression of Triple Negative Mammary Tumors over Time by Chemometric Analysis of Urinary Volatile Organic Compounds	110.154
3-propylcyclopentene	34067-75-9	C8H14	Cyclic, Ketone	Breast/bone metastisis		Differentially expressed compounds in cancerous mice given placebo treatment	Wang et al., 2019	Pitavastatin slows tumor progression and alters urine-derived volatile organic compounds through the mevalonate pathway	110.198
hexan-2-one	591-78-6	C6H12O	Ketone	Breast		Identified as significant in model of breast cancer and Pitavastatin treatment	Grocki et al., 2022	Chemometric Analysis of Urinary Volatile Organic Compounds to Monitor the Efficacy of Pitavastatin Treatments on Mammary Tumor Progression over Time	112.17
heptan-2-one	110-43-0	C7H12O	Ketone	Breast		Identified as significant in model of breast cancer and Pitavastatin treatment	Grocki et al., 2022	Chemometric Analysis of Urinary Volatile Organic Compounds to Monitor the Efficacy of Pitavastatin Treatments on Mammary Tumor Progression over Time	112.17
hexane-3,4-dione	4437-51-8	C6H10O2	Ketone	Lung	Increased 1.255 fold	Identified as significant in model of cancer mortality	Chapman et al., 2023	GC-MS Techniques Investigating Potential Biomarkers of Dying in the Last Weeks with Lung Cancer	114.142
4-methylpent-3-enoic acid	504-85-8	C6H10O2	Carboxylic Acid	Bladder	Increased 1.457 fold	Compound identified by authors in sample and NOT used in model	Lett et al., 2022	Investigation of urinary volatile organic compounds as novel diagnostic and surveillance biomarkers of bladder cancer	114.142
4-methylpent-3-enoic acid	504-85-8	C6H10O2	Carboxylic Acid	Bladder	Found only in cancer group	Compounds occuring only in cancer group	Ligor et al., 2022	Analysis of VOCs in Urine Samples Directed towards of Bladder Cancer Detection	114.142
2-methoxythiophene	16839-97-7	C5H6OS	Organosulfur, Heterocyclic, Ether	Breast	Decreased 0.48 fold	Compounds identified as differential metabolites between cancer and health urine	Yang et al., 2023	Rapid Detection of Volatile Organic Metabolites in Urine by High-Pressure Photoionization Mass Spectrometry for Breast Cancer Screening: A Pilot Study	114.166
5-methylhexan-2-one	110-12-3	C7H14O	Ketone	Breast		Identified as significant in model of breast cancer and Pitavastatin treatment	Grocki et al., 2022	Chemometric Analysis of Urinary Volatile Organic Compounds to Monitor the Efficacy of Pitavastatin Treatments on Mammary Tumor Progression over Time	114.186
heptan-2-one	110-43-0	C7H14O	Ketone	Bladder	Increased 1.177 fold	Compound identified by authors in sample and used in model	Lett et al., 2022	Investigation of urinary volatile organic compounds as novel diagnostic and surveillance biomarkers of bladder cancer	114.186
heptanal	111-71-7	C7H14O	Aldehyde	Bladder	Found only in cancer group	Compounds occuring only in cancer group	Ligor et al., 2022	Analysis of VOCs in Urine Samples Directed towards of Bladder Cancer Detection	114.186
4-heptanone	123-19-3	C7H14O	Ketone	Bladder	Decreased 0.8 fold	Compounds identified as sigificantly different from control group	Ligor et al., 2022	Analysis of VOCs in Urine Samples Directed towards of Bladder Cancer Detection	114.186
4-methylhexan-3-one	17042-16-9	C7H14O	Ketone	Prostate		Compounds previously identified in biomarker study for Pca only to complete model	Lima et al., 2020	A Panel of Urinary Volatile Biomarkers for Differential Diagnosis of Prostate Cancer from Other Urological Cancers	114.186
heptan-2-one	110-43-0	C7H14O	Ketone	Prostate, Bladder, and Renal		Compound found significantly altered in Pca group compared to BC, RC and controls in study	Lima et al., 2020	A Panel of Urinary Volatile Biomarkers for Differential Diagnosis of Prostate Cancer from Other Urological Cancers	114.186
heptan-3-one	106-35-4	C7H14O	Ketone	Prostate, Bladder, and Renal		Compound found significantly altered in Pca group compared to BC, RC and controls in study	Lima et al., 2020	A Panel of Urinary Volatile Biomarkers for Differential Diagnosis of Prostate Cancer from Other Urological Cancers	114.186
heptan-2-one	110-43-0	C7H14O	Ketone	Lung	Significantly increased	Used in study based on previous research	Perez Anton et al., 2016	Headspace-programmed temperature vaporization-mass spectrometry for the rapid determination of possible volatile biomarkers of lung cancer in urine	114.186
heptan-4-one	123-19-3	C7H14O	Ketone	Bladder	Downregulated	Compounds identified as signfiicantly altered in patients	Pinto et al., 2021	Discovery of Volatile Biomarkers for Bladder Cancer Detection and Staging through Urine Metabolomics	114.186
heptanal	111-71-7	C7H14O	Aldehyde	Bladder		Compounds identified as possibility biomarkers of bladder cancer	Tyagi et al., 2021	Urinary Volatiles and Chemical Characterisation for the Non-Invasive Detection of Prostate and Bladder Cancers	114.186
heptan-2-one	110-43-0	C7H14O	Ketone	Bladder		Compounds identified as possibility biomarkers of bladder cancer	Tyagi et al., 2021	Urinary Volatiles and Chemical Characterisation for the Non-Invasive Detection of Prostate and Bladder Cancers	114.186
1-heptanol	111-70-6	C7H16O	Alcohol	Bladder	Found only in cancer group	Compounds occuring only in cancer group	Ligor et al., 2022	Analysis of VOCs in Urine Samples Directed towards of Bladder Cancer Detection	116.201
indole	120-72-9	C8H7N	Aromatic, Heterocyclic	Bladder	Increased 2.8 fold	Compounds identified as sigificantly different from control group	Ligor et al., 2022	Analysis of VOCs in Urine Samples Directed towards of Bladder Cancer Detection	117.15
3-methylbenzaldehyde	620-23-5	C8H8O	Aromatic, Aldehyde	Prostate, Bladder, and Renal		Compound found significantly altered in Pca group compared to BC, RC and controls in study	Lima et al., 2020	A Panel of Urinary Volatile Biomarkers for Differential Diagnosis of Prostate Cancer from Other Urological Cancers	120.15
1-phenylethanone	98-86-2	C8H8O	Aromatic, Ketone	Breast/bone metastisis		Differentially expressed compounds in cancerous mice given pitavastatin treatment	Wang et al., 2019	Pitavastatin slows tumor progression and alters urine-derived volatile organic compounds through the mevalonate pathway	120.15
1,2,4-trimethylbenzene	95-63-6	C9H12	Aromatic	Bladder	Upregulared	Compounds identified as signfiicantly altered in patients	Pinto et al., 2021	Discovery of Volatile Biomarkers for Bladder Cancer Detection and Staging through Urine Metabolomics	120.193
2,6-dimethyaniline	87-62-7	C8H11N	Aromatic, Amine	Bladder	Found only in cancer group	Compounds occuring only in cancer group	Ligor et al., 2022	Analysis of VOCs in Urine Samples Directed towards of Bladder Cancer Detection	121.181
benzoic acid	65-85-0	C7H6O2	Aromatic, Carboxylic Acid	Bladder		Compounds identified as possibility biomarkers of bladder cancer	Tyagi et al., 2021	Urinary Volatiles and Chemical Characterisation for the Non-Invasive Detection of Prostate and Bladder Cancers	122.122
4-methylanisole	104-93-8	C8H10O	Aromatic, Ether	Bladder	Increased 426 fold	Compounds identified as sigificantly different from control group	Ligor et al., 2022	Analysis of VOCs in Urine Samples Directed towards of Bladder Cancer Detection	122.165
4-ethylphenol	123-07-9	C8H10O	Phenol	Bladder	Increased 4.9 fold	Compounds identified as sigificantly different from control group	Ligor et al., 2022	Analysis of VOCs in Urine Samples Directed towards of Bladder Cancer Detection	122.165
2-methoxyphenol	32994	C7H8O2	Phenol, Ether	Bladder	Increased 1.287 fold	Compound identified by authors in sample and NOT used in model	Lett et al., 2022	Investigation of urinary volatile organic compounds as novel diagnostic and surveillance biomarkers of bladder cancer	124.138
2-methoxyphenol	32994	C7H8O2	Phenol, Ether	Bladder	Increased 27.7 fold	Compounds identified as sigificantly different from control group	Ligor et al., 2022	Analysis of VOCs in Urine Samples Directed towards of Bladder Cancer Detection	124.138
octadeca-2,4-dienal	30361-28-5	C8H12O	Aldehyde	Prostate	Downregulated	Identified as significant in a model of Prostate cancer by the authors	Liu et al., 2023(b)	Volatile organic compounds for early detection of prostate cancer from urine	124.181
1-octen-3-one	4312-99-6	C8H14O	Ketone	Bladder	Found only in cancer group	Compounds occuring only in cancer group	Ligor et al., 2022	Analysis of VOCs in Urine Samples Directed towards of Bladder Cancer Detection	126.197
oct-3-en-2-one	1669-44-9	C8H14O	Ketone	Bladder	Increased 8.3 fold	Compounds identified as sigificantly different from control group	Ligor et al., 2022	Analysis of VOCs in Urine Samples Directed towards of Bladder Cancer Detection	126.197
2-ethylhex-2-enal	645-62-5	C8H14O	Aldehyde	Breast/bone metastisis		Differentially expressed compounds in cancerous mice given pitavastatin treatment	Wang et al., 2019	Pitavastatin slows tumor progression and alters urine-derived volatile organic compounds through the mevalonate pathway	126.197
oct-3-en-2-one	1669-44-9	C8H14O	Ketone	Breast/bone metastisis		Differentially expressed compounds in cancerous mice given pitavastatin treatment	Wang et al., 2019	Pitavastatin slows tumor progression and alters urine-derived volatile organic compounds through the mevalonate pathway	126.197
dimethyltrisulfide	3658-80-8	C2H6S3	Organosulfur	Prostate		Compound identified as statistically significant between cancer and control groups	Riccio et al., 2023	Differences in the Volatilomic Urinary Biosignature of Prostate Cancer Patients as a Feasibility Study for the Detection of Potential Biomarkers	126.264
2-amino-1h-imidazole-5-carboxylic acid	1000126-50-5	C4H5N3O2	Heterocyclic, Amine, Carboxylic Acid	Prostate	Downregulated	Identified as significant in model of Prostate Cancer diagnosis and risk assessment	Gao et al., 2019	Application of Urinary Volatile Organic Compounds (VOCs) for the Diagnosis of Prostate Cancer'	127.102
5-ethyl-5-methyloxolan-2-one	2865-82-9	C7H12O2	Heterocyclic, Ester	Lung	Increased 2.015 fold	Identified as significant in model of cancer mortality	Chapman et al., 2023	GC-MS Techniques Investigating Potential Biomarkers of Dying in the Last Weeks with Lung Cancer	128.169
5-ethyl-3-methyloxolan-2-one	2610-98-2	C7H12O2	Heterocyclic, Ester	Bladder	Increased 1.808 fold	Compound identified by authors in sample and used in model	Lett et al., 2022	Investigation of urinary volatile organic compounds as novel diagnostic and surveillance biomarkers of bladder cancer	128.169
2,3-heptanedione	35163	C7H12O2	Ketone	Bladder	Found only in cancer group	Compounds occuring only in cancer group	Ligor et al., 2022	Analysis of VOCs in Urine Samples Directed towards of Bladder Cancer Detection	128.169
naphthalene	91-20-3	C10H8	Polycyclic, Aromatic	Breast		Identified as significant in model of breast cancer and Pitavastatin treatment	Grocki et al., 2022	Chemometric Analysis of Urinary Volatile Organic Compounds to Monitor the Efficacy of Pitavastatin Treatments on Mammary Tumor Progression over Time	128.173
naphthalene	91-20-3	C10H8	Polycyclic, Aromatic	Bladder		Compounds identified as possibility biomarkers of bladder cancer	Tyagi et al., 2021	Urinary Volatiles and Chemical Characterisation for the Non-Invasive Detection of Prostate and Bladder Cancers	128.173
2-methoxy-5-methylthiophene	31053-55-1	C6H8OS	Organosulfur, Heterocyclic, Ether	Prostate	More associated with Cancer	Compound identified as statistically significant between cancer and control groups	Riccio et al., 2023	Differences in the Volatilomic Urinary Biosignature of Prostate Cancer Patients as a Feasibility Study for the Detection of Potential Biomarkers	128.193
octan-2-one	111-13-7	C8H16O	Ketone	Prostate	Decreased	Identified as significant in model of prostate cancer	Khalid et al., 2015	Urinary Volatile Organic Compounds for the Detection of Prostate Cancer	128.212
octan-3-one	106-68-3	C8H16O	Ketone	Prostate	Decreased	Identified as significant in model of prostate cancer	Khalid et al., 2015	Urinary Volatile Organic Compounds for the Detection of Prostate Cancer	128.212
3-methylheptan-2-one	2371-19-9	C8H16O	Ketone	Bladder	Increased 1.285 fold	Compound identified by authors in sample and NOT used in model	Lett et al., 2022	Investigation of urinary volatile organic compounds as novel diagnostic and surveillance biomarkers of bladder cancer	128.212
octan-2-one	111-13-7	C8H16O	Ketone	Prostate	Greater attraction	Compounds theorized to be responsible for nematode chemotaxis towards cancer patients	Thompson et al., 2021	Caenorhabditis elegans behavioral assay distinguishes early stage prostate cancer patient urine from controls	128.212
2,4-dimethylheptane	2213-23-2	C9H20	Alkane	Bladder	Upregulated	Compounds identified as signfiicantly altered in patients	Pinto et al., 2021	Discovery of Volatile Biomarkers for Bladder Cancer Detection and Staging through Urine Metabolomics	128.256
4-methyloctane	2216-34-4	C9H20	Alkane	Bladder	Upregulated	Compounds identified as signfiicantly altered in patients	Pinto et al., 2021	Discovery of Volatile Biomarkers for Bladder Cancer Detection and Staging through Urine Metabolomics	128.256
1,4-dihydronaphthalene	612-17-9	C10H10	Polycyclic, Aromatic	Breast/bone metastisis		Differentially expressed compounds in cancerous mice given pitavastatin treatment	Wang et al., 2019	Pitavastatin slows tumor progression and alters urine-derived volatile organic compounds through the mevalonate pathway	130.188
2-ethylhexan-1-ol	104-76-7	C8H18O	Alcohol	Lung	Increased	Identified as statistically increased in cancer group	Hanai et al., 2012	Urinary Volatile Compounds as Biomarkers for Lung Cancer	130.228
2-ethylhexan-1-ol	104-76-7	C8H18O	Alcohol	Bladder	Decreased 0.413 fold	Compound identified by authors in sample and used in model	Lett et al., 2022	Investigation of urinary volatile organic compounds as novel diagnostic and surveillance biomarkers of bladder cancer	130.228
2-ethylhexan-1-ol	104-76-7	C8H18O	Alcohol	Prostate	Downregulated	Identified as significant in a model of Prostate cancer by the authors	Liu et al., 2023(b)	Volatile organic compounds for early detection of prostate cancer from urine	130.228
2-ethylhexan-1-ol	104-76-7	C8H18O	Alcohol	Lung	Significantly increased	Used in study based on previous research	Perez Anton et al., 2016	Headspace-programmed temperature vaporization-mass spectrometry for the rapid determination of possible volatile biomarkers of lung cancer in urine	130.228
2-ethylhexan-1-ol	104-76-7	C8H18O	Alcohol	Prostate	More associated with Cancer	Compound identified as statistically significant between cancer and control groups	Riccio et al., 2023	Differences in the Volatilomic Urinary Biosignature of Prostate Cancer Patients as a Feasibility Study for the Detection of Potential Biomarkers	130.228
2-ethylhexan-1-ol	104-76-7	C8H18O	Alcohol	Prostate		Compounds identified as possibile biomarkers of prostate cancer	Tyagi et al., 2021	Urinary Volatiles and Chemical Characterisation for the Non-Invasive Detection of Prostate and Bladder Cancers	130.228
pentandioic acid	110-94-1	C5H8O4	Carboxylic Acid	Breast	Upregulated	Compounds identified as potential biomarkers for model of cancer	Li et al., 2023	Development of a headspace-solid phase microextraction gas chromatography-high resolution mass spectrometry method for analyzing volatile organic compounds in urine: Application in breast cancer biomarker discovery	132.114
1,4-dimethyl-2-ethenylbenzene	2039-89-6	C10H12	Aromatic	Breast/bone metastisis		Differentially expressed compounds in cancerous mice given placebo treatment	Wang et al., 2019	Pitavastatin slows tumor progression and alters urine-derived volatile organic compounds through the mevalonate pathway	132.204
2h-1,4-benzoxazine	255-03-8	C8H7NO	Heterocyclic, Aromatic, Polycylic	Cervical		Identified in cancer patients (May also be found in healthy controls)	Leon Martinez et al., 2021	Identification of volatile organic compounds in the urine of patients with cervical cancer. Test concept for timely screening	133.149
2,4-dimethylbenzaldehyde	15764-16-6	C9H10O	Aromatic, Aldehyde	Breast	Downregulated	Compounds identified as potential biomarkers for model of cancer	Li et al., 2023	Development of a headspace-solid phase microextraction gas chromatography-high resolution mass spectrometry method for analyzing volatile organic compounds in urine: Application in breast cancer biomarker discovery	134.176
2,4-dimethylbenzaldehyde	15764-16-6	C9H10O	Aromatic, Aldehyde	Bladder	Increased 251.5 fold	Compounds identified as sigificantly different from control group	Ligor et al., 2022	Analysis of VOCs in Urine Samples Directed towards of Bladder Cancer Detection	134.176
2,5-dimethylbenzaldehyde	5779-94-2	C9H10O	Aromatic, Aldehyde	Bladder	Increased 30.5 fold	Compounds identified as sigificantly different from control group	Ligor et al., 2022	Analysis of VOCs in Urine Samples Directed towards of Bladder Cancer Detection	134.176
2,5-dimethylbenzaldehyde	5779-94-2	C9H10O	Aromatic, Aldehyde	Prostate		Compounds previously identified in biomarker study for Pca only to complete model	Lima et al., 2020	A Panel of Urinary Volatile Biomarkers for Differential Diagnosis of Prostate Cancer from Other Urological Cancers	134.176
3-phenylpropanal	104-53-0	C9H10O	Aromatic, Aldehyde	Prostate		Compounds previously identified in biomarker study for Pca only to complete model	Lima et al., 2020	A Panel of Urinary Volatile Biomarkers for Differential Diagnosis of Prostate Cancer from Other Urological Cancers	134.176
3,5-dimethylbenzaldehyde	5779-95-3	C9H10O	Aromatic, Aldehyde	Prostate	More associated with Cancer	Compound identified as statistically significant between cancer and control groups	Riccio et al., 2023	Differences in the Volatilomic Urinary Biosignature of Prostate Cancer Patients as a Feasibility Study for the Detection of Potential Biomarkers	134.176
4-ethyl-1,2-dimethyl-benzene	934-80-5	C10H14	Aromatic	Pancreatic		Identified as significant in model of Pancreatic Cancer and Pancreatitis	Daulton et al., 2021	Volatile organic compounds (VOCs) for the non-invasive detection of pancreatic cancer from urine	134.22
1,2,4,5-tetramethylbenzene	95-93-2	C10H14	Aromatic	Bladder	Increased 1.119 fold	Compound identified by authors in sample and NOT used in model	Lett et al., 2022	Investigation of urinary volatile organic compounds as novel diagnostic and surveillance biomarkers of bladder cancer	134.22
1-methyl-4-(propan-2-yl)benzene	1195-32-0	C10H14	Aromatic	Prostate	More associated with controls	Compound identified as statistically significant between cancer and control groups	Riccio et al., 2023	Differences in the Volatilomic Urinary Biosignature of Prostate Cancer Patients as a Feasibility Study for the Detection of Potential Biomarkers	134.22
1-(4-hydroxyphenyl)ethan-1-one	99-93-4	C8H8O2	Phenol, Ketone	Breast	Downregulated	Compounds identified as potential biomarkers for model of cancer	Li et al., 2023	Development of a headspace-solid phase microextraction gas chromatography-high resolution mass spectrometry method for analyzing volatile organic compounds in urine: Application in breast cancer biomarker discovery	136.149
methyl benzoate	93-58-3	C8H8O2	Ester	Prostate, Bladder, and Renal		Compound found significantly altered in Pca group compared to BC, RC and controls in study	Lima et al., 2020	A Panel of Urinary Volatile Biomarkers for Differential Diagnosis of Prostate Cancer from Other Urological Cancers	136.149
2-phenyl-2-propanol	617-94-7	C9H12O	Aromatic, Alcohol	Lung	Increased	Identified as statistically increased in cancer group	Hanai et al., 2012	Urinary Volatile Compounds as Biomarkers for Lung Cancer	136.192
1,3,6-heptatriene, 2,5,6-trimethyl	42123-66-0	C10H16	Alkene	Cervical		Identified in cancer patients (May also be found in healthy controls)	Leon Martinez et al., 2021	Identification of volatile organic compounds in the urine of patients with cervical cancer. Test concept for timely screening	136.235
2-methyl-1-methylidene-3-prop-1-en-2-ylcyclopentane	56710-83-9	C10H16	Cyclic, Alkene	Breast/bone metastisis		Differentially expressed compounds in cancerous mice given placebo treatment	Wang et al., 2019	Pitavastatin slows tumor progression and alters urine-derived volatile organic compounds through the mevalonate pathway	136.235
terpinene	99-85-4	C10H16	Cyclic	Breast		Compounds identified as significantly different between early stage (week 1) and later stage (week 3) cancer	Woollam et al., 2023	Tracking the Progression of Triple Negative Mammary Tumors over Time by Chemometric Analysis of Urinary Volatile Organic Compounds	136.235
2,4-dihydroxybenzaldehyde	34701	C7H6O3	Aromatic, Aldehyde, Phenol, Alcohol	Breast	Upregulated	Compounds identified as potential biomarkers for model of cancer	Li et al., 2023	Development of a headspace-solid phase microextraction gas chromatography-high resolution mass spectrometry method for analyzing volatile organic compounds in urine: Application in breast cancer biomarker discovery	138.121
3-acetyl-2,5-dimethyl furan	10599-70-9	C8H10O2	Heterocyclic, Ether, Ketone	Breast	Downregulated	Compounds identified as potential biomarkers for model of cancer	Li et al., 2023	Development of a headspace-solid phase microextraction gas chromatography-high resolution mass spectrometry method for analyzing volatile organic compounds in urine: Application in breast cancer biomarker discovery	138.164
3-methoxy-5-methylphenol	3209-13-0	C8H10O2	Phenol, Ether	Bladder	Increased 9.3 fold	Compounds identified as sigificantly different from control group	Ligor et al., 2022	Analysis of VOCs in Urine Samples Directed towards of Bladder Cancer Detection	138.164
2-ethyl-3-methoxypyrazine	25680-58-4	C7H10N2O	Heterocyclic, Ether	Bladder	Increased 8.4 fold	Compounds identified as sigificantly different from control group	Ligor et al., 2022	Analysis of VOCs in Urine Samples Directed towards of Bladder Cancer Detection	138.168
3,5,5-trimethylcyclohex-2-en-1-one	78-59-1	C9H14O	Cyclic, Ketone	Lung	Increased	Identified as statistically increased in cancer group	Hanai et al., 2012	Urinary Volatile Compounds as Biomarkers for Lung Cancer	138.208
2-pentylfuran	3777-69-3	C9H14O	Heterocyclic, Ether	Breast	Decreased 0.46 fold	Compounds identified as differential metabolites between cancer and health urine	Yang et al., 2023	Rapid Detection of Volatile Organic Metabolites in Urine by High-Pressure Photoionization Mass Spectrometry for Breast Cancer Screening: A Pilot Study	138.208
1,4-benzenediol, 2-methoxy-	824-46-4	C7H8O3	Phenol, Ether	Breast		Compounds identified as significantly different between early stage (week 1) and later stage (week 3) cancer	Woollam et al., 2023	Tracking the Progression of Triple Negative Mammary Tumors over Time by Chemometric Analysis of Urinary Volatile Organic Compounds	140.137
1-(5-methylthiophen-2-yl)ethanone	13679-74-8	C7H8OS	Organicsulfur, Heterocyclic, Ketone	Breast		Identified as significant in model of breast cancer and Pitavastatin treatment	Grocki et al., 2022	Chemometric Analysis of Urinary Volatile Organic Compounds to Monitor the Efficacy of Pitavastatin Treatments on Mammary Tumor Progression over Time	140.204
1-(5-methylthiophen-2-yl)ethanone	13679-74-8	C7H8OS	Organicsulfur, Heterocyclic, Ketone	Breast		Compounds identified as significantly different between early stage (week 1) and later stage (week 3) cancer	Woollam et al., 2023	Tracking the Progression of Triple Negative Mammary Tumors over Time by Chemometric Analysis of Urinary Volatile Organic Compounds	140.204
disulfide, methyl (methylthio)methyl	42474-44-2	C3H8S3	Organosulfur	Breast		Compounds identified as significantly different between early stage (week 1) and later stage (week 3) cancer	Woollam et al., 2023	Tracking the Progression of Triple Negative Mammary Tumors over Time by Chemometric Analysis of Urinary Volatile Organic Compounds	140.291
1,5-dimethyl-6,8-dioxabicyclo[3.2.1]octane	60478-96-8	C8H14O2	Polycyclic, Heterocyclic, Ether	Bladder	Downregulated	Compounds identified as signfiicantly altered in patients	Pinto et al., 2021	Discovery of Volatile Biomarkers for Bladder Cancer Detection and Staging through Urine Metabolomics	142.196
6-methylheptane-2,4-dione	3002-23-1	C8H14O2	Ketone	Breast/bone metastisis		Differentially expressed compounds in cancerous mice given placebo treatment	Wang et al., 2019	Pitavastatin slows tumor progression and alters urine-derived volatile organic compounds through the mevalonate pathway	142.196
1-methylnaphthalene	90-12-0	C11H10	Polycyclic, Aromatic	Bladder	Upregulated	Compounds identified as signfiicantly altered in patients	Pinto et al., 2021	Discovery of Volatile Biomarkers for Bladder Cancer Detection and Staging through Urine Metabolomics	142.199
2-methylnaphthalene	91-57-6	C11H10	Polycyclic, Aromatic	Bladder	Upregulated	Compounds identified as signfiicantly altered in patients	Pinto et al., 2021	Discovery of Volatile Biomarkers for Bladder Cancer Detection and Staging through Urine Metabolomics	142.199
nonanal	124-19-6	C9H18O	Aldehyde	Pancreatic		Identified as significant in model of Pancreatic Cancer and Pancreatitis	Daulton et al., 2021	Volatile organic compounds (VOCs) for the non-invasive detection of pancreatic cancer from urine	142.239
nonan-2-one	821-55-6	C9H18O	Ketone	Breast		Identified as significant in model of breast cancer and Pitavastatin treatment	Grocki et al., 2022	Chemometric Analysis of Urinary Volatile Organic Compounds to Monitor the Efficacy of Pitavastatin Treatments on Mammary Tumor Progression over Time	142.239
nonanal	124-19-6	C9H18O	Aldehyde	Bladder	Decreased 0.306 fold	Compound identified by authors in sample and used in model	Lett et al., 2022	Investigation of urinary volatile organic compounds as novel diagnostic and surveillance biomarkers of bladder cancer	142.239
4,6-dimethyl-2-heptanone	19549-80-5	C9H18O	Ketone	Bladder	Found only in cancer group	Compounds occuring only in cancer group	Ligor et al., 2022	Analysis of VOCs in Urine Samples Directed towards of Bladder Cancer Detection	142.239
nonanal	124-19-6	C9H18O	Aldehyde	Bladder		Compounds identified as possibility biomarkers of bladder cancer	Tyagi et al., 2021	Urinary Volatiles and Chemical Characterisation for the Non-Invasive Detection of Prostate and Bladder Cancers	142.239
1,2,4-trimethylcyclohexane	2234-75-5	C9H18O	Cyclic	Breast/bone metastisis		Differentially expressed compounds in cancerous mice given pitavastatin treatment	Wang et al., 2019	Pitavastatin slows tumor progression and alters urine-derived volatile organic compounds through the mevalonate pathway	142.239
1,2,3-trimethylcyclohexane	1678-97-3	C9H18O	Cyclic	Breast		Compounds identified as significantly different between early stage (week 1) and later stage (week 3) cancer	Woollam et al., 2023	Tracking the Progression of Triple Negative Mammary Tumors over Time by Chemometric Analysis of Urinary Volatile Organic Compounds	142.239
1,2,4-trimethylcyclohexane	2234-75-5	C9H18O	Cyclic	Breast		Compounds identified as significantly different between early stage (week 1) and later stage (week 3) cancer	Woollam et al., 2023	Tracking the Progression of Triple Negative Mammary Tumors over Time by Chemometric Analysis of Urinary Volatile Organic Compounds	142.239
2-nonanone	821-55-6	C9H18O	Ketone	Breast		Compounds identified as significantly different between early stage (week 1) and later stage (week 3) cancer	Woollam et al., 2023	Tracking the Progression of Triple Negative Mammary Tumors over Time by Chemometric Analysis of Urinary Volatile Organic Compounds	142.239
2,6-dimethyloctane	2051-30-1	C10H22	Alkane	Pancreatic		Identified as significant in model of Pancreatic Cancer and Pancreatitis	Daulton et al., 2021	Volatile organic compounds (VOCs) for the non-invasive detection of pancreatic cancer from urine	142.282
2-methylnonane	871-83-0	C10H22	Alkane	Bladder	Upregulated	Compounds identified as signfiicantly altered in patients	Pinto et al., 2021	Discovery of Volatile Biomarkers for Bladder Cancer Detection and Staging through Urine Metabolomics	142.282
3-methylnonane	5911-04-06	C10H22	Alkane	Prostate and Bladder		Compounds identified as possibile biomarkers for descriminating prostate and bladder cancer	Tyagi et al., 2021	Urinary Volatiles and Chemical Characterisation for the Non-Invasive Detection of Prostate and Bladder Cancers	142.282
4-(2-methylpropoxy)butan-2-one	31576-33-7	C8H16O2	Ether, Ketone	Prostate, Bladder, and Renal		Compound found significantly altered in Pca group compared to BC, RC and controls in study	Lima et al., 2020	A Panel of Urinary Volatile Biomarkers for Differential Diagnosis of Prostate Cancer from Other Urological Cancers	144.211
octanoic acid	124-07-2	C8H17O2	Carboxylic Acid	Breast	Decreased 0.45 fold	Compounds identified as differential metabolites between cancer and health urine	Yang et al., 2023	Rapid Detection of Volatile Organic Metabolites in Urine by High-Pressure Photoionization Mass Spectrometry for Breast Cancer Screening: A Pilot Study	145.219
1-ethenyl-2-methylbenzene	611-14-3	C9H10O2	Aromatic	Pancreatic		Identified as significant in model of Pancreatic Cancer and Pancreatitis	Daulton et al., 2021	Volatile organic compounds (VOCs) for the non-invasive detection of pancreatic cancer from urine	150.175
ethyl benzoate	93-89-0	C9H10O2	Ester, Aromatic	Breast		Identified as significant in model of breast cancer and Pitavastatin treatment	Grocki et al., 2022	Chemometric Analysis of Urinary Volatile Organic Compounds to Monitor the Efficacy of Pitavastatin Treatments on Mammary Tumor Progression over Time	150.175
benzyl acetate	140-11-4	C9H10O2	Ester, Aromatic	Bladder	Increased 6.1 fold	Compounds identified as sigificantly different from control group	Ligor et al., 2022	Analysis of VOCs in Urine Samples Directed towards of Bladder Cancer Detection	150.175
2-methoxy-4-vinylphenol	7786-61-0	C9H10O2	Phenol, Ether	Bladder	Decreased 0.2 fold	Compounds identified as sigificantly different from control group	Ligor et al., 2022	Analysis of VOCs in Urine Samples Directed towards of Bladder Cancer Detection	150.175
2,6,6-trimethylcyclohexa-1,3-diene-1-carbaldehyde	116-26-7	C10H14O	Cyclic, Carboxylic acid	Bladder	Increased 1.8 fold	Compounds identified as sigificantly different from control group	Ligor et al., 2022	Analysis of VOCs in Urine Samples Directed towards of Bladder Cancer Detection	150.219
2-methyl-5-(prop-1-en-2-yl)cyclohex-2-en-1-one	2244-16-8	C10H14O	Cyclic, Ketone	Bladder	Downregulated	Compounds identified as signfiicantly altered in patients	Pinto et al., 2021	Discovery of Volatile Biomarkers for Bladder Cancer Detection and Staging through Urine Metabolomics	150.219
2-methyl-5-(prop-1-en-2-yl)cyclohex-2-en-1-one	6485-40-1	C10H14O	Cyclic, Ketone	Prostate	More associated with controls	Compound identified as statistically significant between cancer and control groups	Riccio et al., 2023	Differences in the Volatilomic Urinary Biosignature of Prostate Cancer Patients as a Feasibility Study for the Detection of Potential Biomarkers	150.219
2-ethyl-4-methylanisole	79744-78-8	C10H14O	Aromatic, Ether	Breast		Compounds identified as significantly different between early stage (week 1) and later stage (week 3) cancer	Woollam et al., 2023	Tracking the Progression of Triple Negative Mammary Tumors over Time by Chemometric Analysis of Urinary Volatile Organic Compounds	150.219
2,6,6-trimethylcyclohexa-1,3-diene-1-carbaldehyde	116-26-7	C10H14O	Cyclic, Carboxylic acid	Breast		Compounds identified as significantly different between early stage (week 1) and later stage (week 3) cancer	Woollam et al., 2023	Tracking the Progression of Triple Negative Mammary Tumors over Time by Chemometric Analysis of Urinary Volatile Organic Compounds	150.219
(3e,5e)-undeca-1,3,5-triene	19883-29-5	C11H18	Alkene	Breast		Identified as significant in model of breast cancer and Pitavastatin treatment	Grocki et al., 2022	Chemometric Analysis of Urinary Volatile Organic Compounds to Monitor the Efficacy of Pitavastatin Treatments on Mammary Tumor Progression over Time	150.262
1,3,5-undecatriene	19883-29-5	C11H18	Alkene	Breast		Compounds identified as significantly different between early stage (week 1) and later stage (week 3) cancer	Woollam et al., 2023	Tracking the Progression of Triple Negative Mammary Tumors over Time by Chemometric Analysis of Urinary Volatile Organic Compounds	150.262
2,6,6-trimethylcyclohex-2-ene-1,4-dione	1125-21-9	C9H12O2	Cyclic, Ketone	Bladder	Increased 3.0 fold	Compounds identified as sigificantly different from control group	Ligor et al., 2022	Analysis of VOCs in Urine Samples Directed towards of Bladder Cancer Detection	152.191
2,6,6-trimethyl-2-cyclohexene-1,4-dione	1125-21-9	C9H12O2	Cyclic, Ketone	Breast		Compounds identified as significantly different between early stage (week 1) and later stage (week 3) cancer	Woollam et al., 2023	Tracking the Progression of Triple Negative Mammary Tumors over Time by Chemometric Analysis of Urinary Volatile Organic Compounds	152.191
1,2-dimethyl-4-oxocyclohex-2-enecarboxaldehyde		C9H12O2	Cyclic, Ketone, Aldehyde	Breast		Compounds identified as significantly different between early stage (week 1) and later stage (week 3) cancer	Woollam et al., 2023	Tracking the Progression of Triple Negative Mammary Tumors over Time by Chemometric Analysis of Urinary Volatile Organic Compounds	152.191
3-methyl-6-propan-2-ylcyclohex-2-en-1-one	89-81-6	C10H16O	Cyclic, Ketone	Bladder	Downregulated	Compounds identified as signfiicantly altered in patients	Pinto et al., 2021	Discovery of Volatile Biomarkers for Bladder Cancer Detection and Staging through Urine Metabolomics	152.234
4-methyl-1-propan-2-ylbicyclo[3.1.0]hex-3-en-2-ol	3310-03-0	C10H16O	Polycyclic, Alcohol	Breast		Compounds identified as significantly different between early stage (week 1) and later stage (week 3) cancer	Woollam et al., 2023	Tracking the Progression of Triple Negative Mammary Tumors over Time by Chemometric Analysis of Urinary Volatile Organic Compounds	152.234
1,1′-biphenyl	92-52-4	C12H10	Aromatic	Bladder		Compounds identified as possibility biomarkers of bladder cancer	Tyagi et al., 2021	Urinary Volatiles and Chemical Characterisation for the Non-Invasive Detection of Prostate and Bladder Cancers	154.21
1,3,3-trimethyl-2-oxabicyclo[2.2.2]octane	18679-48-6	C10H18O	Ether, Polycyclic, Heterocyclic	Lung	Decreased 2.009 fold	Identified as significant in model of cancer mortality	Chapman et al., 2023	GC-MS Techniques Investigating Potential Biomarkers of Dying in the Last Weeks with Lung Cancer	154.25
1-methyl-4-propan-2-ylcyclohex-2-en-1-ol		C10H18O	Cyclic, Alcohol	Bladder		Compound identified by authors in sample and used in model	Lett et al., 2022	Investigation of urinary volatile organic compounds as novel diagnostic and surveillance biomarkers of bladder cancer	154.25
2-cyclohexen-1-ol, 3-methyl-6-(1-methylethyl)-, trans-	16721-39-4	C10H18O	Cyclic, Alcohol	Breast	Upregulated	Compounds identified as potential biomarkers for model of cancer	Li et al., 2023	Development of a headspace-solid phase microextraction gas chromatography-high resolution mass spectrometry method for analyzing volatile organic compounds in urine: Application in breast cancer biomarker discovery	154.25
tetrahydro-4-methyl-2-(2-methyl-1-propenyl)pyran	16409-43-1	C10H18O	Ether, Heterocyclic	Bladder	Increased 4.0 fold	Compounds identified as sigificantly different from control group	Ligor et al., 2022	Analysis of VOCs in Urine Samples Directed towards of Bladder Cancer Detection	154.25
2,6-dimethyl-7-octen-4-one	1879-00-1	C10H18O	Ketone	Breast/bone metastisis		Differentially expressed compounds in cancerous mice given placebo treatment	Wang et al., 2019	Pitavastatin slows tumor progression and alters urine-derived volatile organic compounds through the mevalonate pathway	154.25
2,6-dimethyloct-7-en-2-ol	18479-58-8	C10H20O	Alcohol	Prostate	Decreased	Identified as significant in model of prostate cancer	Khalid et al., 2015	Urinary Volatile Organic Compounds for the Detection of Prostate Cancer	156.266
2,6-dimethyloct-7-en-2-ol	18479-58-8	C10H20O	Alcohol	Bladder	Not statistically siginificant?	Compound identified by authors in sample and used in model	Lett et al., 2022	Investigation of urinary volatile organic compounds as novel diagnostic and surveillance biomarkers of bladder cancer	156.266
decanal	112-31-2	C10H20O	Aldehyde	Bladder	Decreased 0.9 fold	Compounds identified as sigificantly different from control group	Ligor et al., 2022	Analysis of VOCs in Urine Samples Directed towards of Bladder Cancer Detection	156.266
2,6-dimethyloct-7-en-2-ol	18479-58-8	C10H20O	Alcohol	Prostate		Compound identified as statistically significant between cancer and control groups	Riccio et al., 2023	Differences in the Volatilomic Urinary Biosignature of Prostate Cancer Patients as a Feasibility Study for the Detection of Potential Biomarkers	156.266
2,6-dimethylnonane	17302-28-2	C11H24	Alkane	Bladder	Upregulated	Compounds identified as signfiicantly altered in patients	Pinto et al., 2021	Discovery of Volatile Biomarkers for Bladder Cancer Detection and Staging through Urine Metabolomics	156.309
undecane	1120-21-4	C11H24	Alkane	Bladder		Compounds identified as possibility biomarkers of bladder cancer	Tyagi et al., 2021	Urinary Volatiles and Chemical Characterisation for the Non-Invasive Detection of Prostate and Bladder Cancers	156.309
1-propan-2-ylpyrrolo[2,3-b]pyridine		C10H12N2	Heterocyclic, Polycylic	Breast/bone metastisis		Differentially expressed compounds in cancerous mice given pitavastatin treatment	Wang et al., 2019	Pitavastatin slows tumor progression and alters urine-derived volatile organic compounds through the mevalonate pathway	160.218
1-chlorononane	2473-01-0	C9H19Cl	Organohalide	Bladder		Used in study based on previous research	Bhattacharyya et al., 2022	“Seeing” invisible volatile organic compound (VOC) marker of urinary bladder cancer: A development from bench to bedside prototype spectroscopic device	162.701
methyl 2,4,6-trimethylbenzoate	2282-84-0	C10H11O2	Aromatic, Carboxylic Acid	Cervical		Identified in cancer patients (May also be found in healthy controls)	Leon Martinez et al., 2021	Identification of volatile organic compounds in the urine of patients with cervical cancer. Test concept for timely screening	163.194
2-hydroxy-6-(propan-2-yl)cyclohepta-2,4,6-trien-1-one	499-44-5	C10H12O2	Aromatic, Ketone	Breast		Identified as significant in model of breast cancer and Pitavastatin treatment	Grocki et al., 2022	Chemometric Analysis of Urinary Volatile Organic Compounds to Monitor the Efficacy of Pitavastatin Treatments on Mammary Tumor Progression over Time	164.202
4-propylbenzaldehyde	28785-06-0	C10H12O2	Aromatic, Aldehyde	Bladder	Found only in cancer group	Compounds occuring only in cancer group	Ligor et al., 2022	Analysis of VOCs in Urine Samples Directed towards of Bladder Cancer Detection	164.202
4-isopropylbenzaldehyde	122-03-2	C10H12O2	Aromatic, Aldehyde	Breast		Compounds identified as significantly different between early stage (week 1) and later stage (week 3) cancer	Woollam et al., 2023	Tracking the Progression of Triple Negative Mammary Tumors over Time by Chemometric Analysis of Urinary Volatile Organic Compounds	164.202
2-hydroxy-6-(propan-2-yl)cyclohepta-2,4,6-trien-1-one	499-44-5	C10H12O2	Aromatic, Ketone	Breast		Compounds identified as significantly different between early stage (week 1) and later stage (week 3) cancer	Woollam et al., 2023	Tracking the Progression of Triple Negative Mammary Tumors over Time by Chemometric Analysis of Urinary Volatile Organic Compounds	164.202
1-butan-2-yl-4-methoxybenzene	4917-90-2	C11H16O	Aromatic, Ether	Breast		Identified as significant in model of breast cancer and Pitavastatin treatment	Grocki et al., 2022	Chemometric Analysis of Urinary Volatile Organic Compounds to Monitor the Efficacy of Pitavastatin Treatments on Mammary Tumor Progression over Time	164.245
2-ethyl-5-propylphenol	72386-20-0	C11H16O	Phenol	Breast		Identified as significant in model of breast cancer and Pitavastatin treatment	Grocki et al., 2022	Chemometric Analysis of Urinary Volatile Organic Compounds to Monitor the Efficacy of Pitavastatin Treatments on Mammary Tumor Progression over Time	164.245
phenol, 4-(1,1-dimethylethyl)-2-methyl-	98-27-1	C11H16O	Phenol	Breast		Identified as significant in model of breast cancer and Pitavastatin treatment	Grocki et al., 2022	Chemometric Analysis of Urinary Volatile Organic Compounds to Monitor the Efficacy of Pitavastatin Treatments on Mammary Tumor Progression over Time	164.245
benzene, 1-methoxy-4-(1-methylpropyl)-	4917-90-2	C11H16O	Aromatic, Ether	Breast		Compounds identified as significantly different between early stage (week 1) and later stage (week 3) cancer	Woollam et al., 2023	Tracking the Progression of Triple Negative Mammary Tumors over Time by Chemometric Analysis of Urinary Volatile Organic Compounds	164.245
2-ethyl-5-n-propylphenol	72386-20-0	C11H16O	Phenol	Breast		Compounds identified as significantly different between early stage (week 1) and later stage (week 3) cancer	Woollam et al., 2023	Tracking the Progression of Triple Negative Mammary Tumors over Time by Chemometric Analysis of Urinary Volatile Organic Compounds	164.245
cyclohexane, 1,5-dimethyl-2,3-divinyl-		C12H20	Cyclic, Alkene	Cervical		Identified in cancer patients (May also be found in healthy controls)	Leon Martinez et al., 2021	Identification of volatile organic compounds in the urine of patients with cervical cancer. Test concept for timely screening	164.289
1-(4-hydroxy-2-methylphenyl) ethanone	493-33-4	C9H10O3	Phenol, ether, ketone	Breast/bone metastisis		Differentially expressed compounds in cancerous mice given placebo treatment	Wang et al., 2019	Pitavastatin slows tumor progression and alters urine-derived volatile organic compounds through the mevalonate pathway	166.174
cyclopentanol, 3-methyl-2-(2-pentenyl)-		C11H20O	Cyclic, Alcohol	Cervical		Identified in cancer patients (May also be found in healthy controls)	Leon Martinez et al., 2021	Identification of volatile organic compounds in the urine of patients with cervical cancer. Test concept for timely screening	168.277
bicyclo[2.2.1]heptane-7-methanol, 2-hydroxy-1,7-dimethyl-	54831-21-9	C10H18O2	Polycyclic, Heterocyclic, Alcohol	Cervical		Identified in cancer patients (May also be found in healthy controls)	Leon Martinez et al., 2021	Identification of volatile organic compounds in the urine of patients with cervical cancer. Test concept for timely screening	170.249
undecan-2-one	112-12-9	C11H22O	Aldehyde	Breast		Identified as significant in model of breast cancer and Pitavastatin treatment	Grocki et al., 2022	Chemometric Analysis of Urinary Volatile Organic Compounds to Monitor the Efficacy of Pitavastatin Treatments on Mammary Tumor Progression over Time	170.292
2-undecen-1-al	75039-83-7	C11H22O	Aldehyde	Prostate	Downregulated	Identified as significant in a model of Prostate cancer by the authors	Liu et al., 2023(b)	Volatile organic compounds for early detection of prostate cancer from urine	170.292
undecan-2-one	112-12-9	C11H22O	Ketone	Breast		Compounds identified as significantly different between early stage (week 1) and later stage (week 3) cancer	Woollam et al., 2023	Tracking the Progression of Triple Negative Mammary Tumors over Time by Chemometric Analysis of Urinary Volatile Organic Compounds	170.292
3,8-dimethyldecane	17312-55-9	C12H26	Alkane	Cervical		Identified in cancer patients (May also be found in healthy controls)	Leon Martinez et al., 2021	Identification of volatile organic compounds in the urine of patients with cervical cancer. Test concept for timely screening	170.336
dodecane	112-40-3	C12H26	Alkane	Bladder		Compounds identified as possibility biomarkers of bladder cancer	Tyagi et al., 2021	Urinary Volatiles and Chemical Characterisation for the Non-Invasive Detection of Prostate and Bladder Cancers	170.336
ethyl-4-(ethyloxy)-2-oxobut-3-enoate	76240-19-2	C8H12O4	Ether, Ester, Ketone	Breast		Compounds identified as significantly different between early stage (week 1) and later stage (week 3) cancer	Woollam et al., 2023	Tracking the Progression of Triple Negative Mammary Tumors over Time by Chemometric Analysis of Urinary Volatile Organic Compounds	172.178
4-methylsulfanylphenol	14763-60-1	C7H8O3S	Phenol, organosulfur	Breast/bone metastisis		Differentially expressed compounds in cancerous mice given placebo treatment	Wang et al., 2019	Pitavastatin slows tumor progression and alters urine-derived volatile organic compounds through the mevalonate pathway	172.202
1,1,6-trimethyl-1,2-dihydronaphthalene	30364-38-6	C13H16	Aromatic, Heterocyclic	Prostate	More associated with Cancer	Compound identified as statistically significant between cancer and control groups	Riccio et al., 2023	Differences in the Volatilomic Urinary Biosignature of Prostate Cancer Patients as a Feasibility Study for the Detection of Potential Biomarkers	172.268
1-methylindole-2-carboxylic acid	16136-58-6	C10H9NO2	Heterocyclic, Polycyclic, Aromatic, Carboxylic Acid	Cervical		Identified in cancer patients (May also be found in healthy controls)	Leon Martinez et al., 2021	Identification of volatile organic compounds in the urine of patients with cervical cancer. Test concept for timely screening	175.186
nonanoyl chloride	764-85-2	C9H17ClO	Organohalide	Bladder		Used in study based on previous research	Zhu et al., 2019	Optical sensory arrays for the detection of urinary bladder cancer-related volatile organic compounds	176.684
2,6-di(propan-2-yl)phenol	2078-54-8	C12H18O	Phenol	Lung	Increased	Identified as statistically increased in cancer group	Hanai et al., 2012	Urinary Volatile Compounds as Biomarkers for Lung Cancer	178.272
4-isopropenyl-4,7-dimethyl-1-oxaspiro[2.5]octane		C12H20O	Heterocyclic, Cyclic	Cervical		Identified in cancer patients (May also be found in healthy controls)	Leon Martinez et al., 2021	Identification of volatile organic compounds in the urine of patients with cervical cancer. Test concept for timely screening	180.288
1,3,5-trichlorobenzene	108-70-3	C6H3Cl3	Aromatic, Organohalide	Breast		Identified as significant in model of breast cancer and Pitavastatin treatment	Grocki et al., 2022	Chemometric Analysis of Urinary Volatile Organic Compounds to Monitor the Efficacy of Pitavastatin Treatments on Mammary Tumor Progression over Time	181.449
1,3,5-trichlorobenzene	108-70-3	C6H3Cl3	Organohalide	Breast		Compounds identified as significantly different between early stage (week 1) and later stage (week 3) cancer	Woollam et al., 2023	Tracking the Progression of Triple Negative Mammary Tumors over Time by Chemometric Analysis of Urinary Volatile Organic Compounds	181.449
4-hydroxy-2,6,6-trimethyl-3-oxocyclohex-1-ene-1-carboxaldehyde	141891-14-7	C10H14O3	Alcohol, Aldehyde, Ketone, Cyclic	Breast		Compounds identified as significantly different between early stage (week 1) and later stage (week 3) cancer	Woollam et al., 2023	Tracking the Progression of Triple Negative Mammary Tumors over Time by Chemometric Analysis of Urinary Volatile Organic Compounds	182.217
diphenylmethanone	119-61-9	C13H10O	Aromatic, Ketone	Bladder	Increased 2.4 fold	Compounds identified as sigificantly different from control group	Ligor et al., 2022	Analysis of VOCs in Urine Samples Directed towards of Bladder Cancer Detection	182.22
(2,6,6-trimethylcyclohex-1-enyl)acetic acid	24739-72-8	C11H18O2	Cyclic, Carboxylic Acid	Cervical		Identified in cancer patients (May also be found in healthy controls)	Leon Martinez et al., 2021	Identification of volatile organic compounds in the urine of patients with cervical cancer. Test concept for timely screening	182.26
2-n-heptylcyclopentanone	137-03-1	C12H22O	Cyclic, Ketone	Breast		Compounds identified as significantly different between early stage (week 1) and later stage (week 3) cancer	Woollam et al., 2023	Tracking the Progression of Triple Negative Mammary Tumors over Time by Chemometric Analysis of Urinary Volatile Organic Compounds	182.303
1-methyl-7-(1-methylethyl)naphthalene	490-65-3	C14H16	Polycyclic, Aromatic	Prostate		Compound identified as statistically significant between cancer and control groups	Riccio et al., 2023	Differences in the Volatilomic Urinary Biosignature of Prostate Cancer Patients as a Feasibility Study for the Detection of Potential Biomarkers	184.279
undecane, 3,5-dimethyl-	17312-81-1	C13H28	Alkane	Cervical		Identified in cancer patients (May also be found in healthy controls)	Leon Martinez et al., 2021	Identification of volatile organic compounds in the urine of patients with cervical cancer. Test concept for timely screening	184.363
dodecan-1-ol	112-53-8	C12H26O	Alcohol	Breast		Identified as significant in model of breast cancer and Pitavastatin treatment	Grocki et al., 2022	Chemometric Analysis of Urinary Volatile Organic Compounds to Monitor the Efficacy of Pitavastatin Treatments on Mammary Tumor Progression over Time	186.335
2-butyl-1-octanol	735273	C12H26O	Alcohol	Bladder	Found only in cancer group	Compounds occuring only in cancer group	Ligor et al., 2022	Analysis of VOCs in Urine Samples Directed towards of Bladder Cancer Detection	186.335
1-(2,6,6-trimethylcyclohexa-1,3-dien-1-yl)-2-buten-1-one	59739-63-8	C13H18O	Cyclic, Ketone	Lung	Decreased 1.685 fold	Identified as significant in model of cancer mortality	Chapman et al., 2023	GC-MS Techniques Investigating Potential Biomarkers of Dying in the Last Weeks with Lung Cancer	190.283
(3e,5e)-8,8,9-trimethyldeca-3,5-diene-2,7-dione		C13H18O	Cyclic, Ketone	Breast		Identified as significant in model of breast cancer and Pitavastatin treatment	Grocki et al., 2022	Chemometric Analysis of Urinary Volatile Organic Compounds to Monitor the Efficacy of Pitavastatin Treatments on Mammary Tumor Progression over Time	190.283
(z)-1-(2,6,6-trimethylcyclohexa-1,3-dien-1-yl)but-2-en-1-one	59739-63-8	C13H18O	Cyclic, Ketone	Breast		Identified as significant in model of breast cancer and Pitavastatin treatment	Grocki et al., 2022	Chemometric Analysis of Urinary Volatile Organic Compounds to Monitor the Efficacy of Pitavastatin Treatments on Mammary Tumor Progression over Time	190.283
1-(2,6,6-trimethylcyclohexa-1,3-dien-1-yl)-2-buten-1-one	23726-93-4	C13H18O	Cyclic, Ketone	Bladder	Increased 10.4 fold	Compounds identified as sigificantly different from control group	Ligor et al., 2022	Analysis of VOCs in Urine Samples Directed towards of Bladder Cancer Detection	190.283
1,1,4a-trimethyl-4,5,6,7-tetrahydro-3h-naphthalen-2-one	4668-61-5	C13H20O	Polycylic, Ketone	Lung	Decreased 2.715 fold	Identified as significant in model of cancer mortality	Chapman et al., 2023	GC-MS Techniques Investigating Potential Biomarkers of Dying in the Last Weeks with Lung Cancer	192.299
1,1,4a-trimethyl-4,5,6,7-tetrahydro-3h-naphthalene-2-one		C13H20O	Polycylic, Ketone	Bladder	Decreased 0.388 fold	Compound identified by authors in sample and used in model	Lett et al., 2022	Investigation of urinary volatile organic compounds as novel diagnostic and surveillance biomarkers of bladder cancer	192.299
1-(2,6,6-trimethyl-1-cyclohexenyl)-2-buten-1-one	23726-94-5	C13H20O	Cyclic, Ketone	Bladder	Increased 5.8 fold	Compounds identified as sigificantly different from control group	Ligor et al., 2022	Analysis of VOCs in Urine Samples Directed towards of Bladder Cancer Detection	192.299
6-methylphenanthridine	3955-65-5	C14H11N	Heterocyclic, Polycyclic, Aromatic	Prostate		Compound identified as statistically significant between cancer and control groups	Riccio et al., 2023	Differences in the Volatilomic Urinary Biosignature of Prostate Cancer Patients as a Feasibility Study for the Detection of Potential Biomarkers	193.247
benzoic acid, 4-ethoxy-, ethyl ester	23676-09-7	C11H14O3	Aromatic, Ester, Ether	Breast		Compounds identified as significantly different between early stage (week 1) and later stage (week 3) cancer	Woollam et al., 2023	Tracking the Progression of Triple Negative Mammary Tumors over Time by Chemometric Analysis of Urinary Volatile Organic Compounds	194.228
tricyclo[4.3.1.1(3,8)]undecane-1-carboxylic acid	31061-65-1	C12H18O2	Polycyclic, Carboxylic Acid	Cervical		Identified in cancer patients (May also be found in healthy controls)	Leon Martinez et al., 2021	Identification of volatile organic compounds in the urine of patients with cervical cancer. Test concept for timely screening	194.271
dicyclohexylmethanone	119-60-8	C13H22O	Ketone, Cyclic	Breast		Identified as significant in model of breast cancer and Pitavastatin treatment	Grocki et al., 2022	Chemometric Analysis of Urinary Volatile Organic Compounds to Monitor the Efficacy of Pitavastatin Treatments on Mammary Tumor Progression over Time	194.314
4-(2,6,6-trimethyl-1-cyclohexenyl)-2-butanone	17283-81-7	C13H22O	Cyclic, Ketone	Bladder	Increased 4.0 fold	Compounds identified as sigificantly different from control group	Ligor et al., 2022	Analysis of VOCs in Urine Samples Directed towards of Bladder Cancer Detection	194.314
6,10-dimethyl-5,9-undecadien-2-one	3796-70-1	C13H22O	Ketone	Bladder	Increased 22.1 fold	Compounds identified as sigificantly different from control group	Ligor et al., 2022	Analysis of VOCs in Urine Samples Directed towards of Bladder Cancer Detection	194.314
(2s,8ar)-2,5,5,8a-tetramethyl-3,4,4a,6-tetrahydro-2h-chromene	74006-61-4	C13H22O	Polycyclic, heterocyclic	Prostate		Compounds previously identified in biomarker study for Pca only to complete model	Lima et al., 2020	A Panel of Urinary Volatile Biomarkers for Differential Diagnosis of Prostate Cancer from Other Urological Cancers	194.314
2,6,6,10-tetramethyl-1-oxaspiro[4.5]dec-9-ene	36431-72-8	C13H22O	Cyclic, Heterocyclic	Prostate		Compound identified as statistically significant between cancer and control groups	Riccio et al., 2023	Differences in the Volatilomic Urinary Biosignature of Prostate Cancer Patients as a Feasibility Study for the Detection of Potential Biomarkers	194.314
phenylpropylpyridine	2057-49-0	C14H15N	Heterocyclic, Aromatic	Bladder	Increased 2.5 fold	Compounds identified as sigificantly different from control group	Ligor et al., 2022	Analysis of VOCs in Urine Samples Directed towards of Bladder Cancer Detection	197.279
5-octyloxolan-2-one		C12H22O2	Ester, Cyclic	Bladder	Increased 5.1 fold	Compounds identified as sigificantly different from control group	Ligor et al., 2022	Analysis of VOCs in Urine Samples Directed towards of Bladder Cancer Detection	198.302
tetradecane	629-59-4	C14H30	Alkane	Bladder		Compounds identified as possibility biomarkers of bladder cancer	Tyagi et al., 2021	Urinary Volatiles and Chemical Characterisation for the Non-Invasive Detection of Prostate and Bladder Cancers	198.389
1(2h)-naphthalenone, 3-(1,1-dimethylethyl)-3,4-dihydro-	42981-74-8	C14H18O	Polycyclic, Aromatic, Ketone	Breast		Compounds identified as significantly different between early stage (week 1) and later stage (week 3) cancer	Woollam et al., 2023	Tracking the Progression of Triple Negative Mammary Tumors over Time by Chemometric Analysis of Urinary Volatile Organic Compounds	202.294
(1e,5e)-1,4,4-trimethyl-8-methylidenecycloundeca-1,5-diene	116-01-1	C15H24	Cyclic, Alkene	Cervical		Identified in cancer patients (May also be found in healthy controls)	Leon Martinez et al., 2021	Identification of volatile organic compounds in the urine of patients with cervical cancer. Test concept for timely screening	204.353
cycloheptane, 1-ethenyl-1-methyl-4-methylene-2-(2-methyl-1-propenyl)-	826337-63-7	C15H24	Cyclic, Alkene	Cervical		Identified in cancer patients (May also be found in healthy controls)	Leon Martinez et al., 2021	Identification of volatile organic compounds in the urine of patients with cervical cancer. Test concept for timely screening	204.353
(1r,4e,9s)-4,11,11-trimethyl-8-methylidenebicyclo[7.2.0]undec-4-ene	87-44-5	C15H24	Polycyclic, Alkene	Cervical		Identified in cancer patients (May also be found in healthy controls)	Leon Martinez et al., 2021	Identification of volatile organic compounds in the urine of patients with cervical cancer. Test concept for timely screening	204.353
(3z)-4,11,11-trimethyl-8-methylidenebicyclo[7.2.0]undec-3-ene		C15H24	Polycyclic, Alkene	Cervical		Identified in cancer patients (May also be found in healthy controls)	Leon Martinez et al., 2021	Identification of volatile organic compounds in the urine of patients with cervical cancer. Test concept for timely screening	204.353
1h-benzocycloheptene, 2,4a,5,6,7,8,9,9a-octahydro-3,5,5-trimethyl-9-methylene-, (4as-cis)-	3853-83-6	C15H24	Polycyclic, Alkene	Cervical		Identified in cancer patients (May also be found in healthy controls)	Leon Martinez et al., 2021	Identification of volatile organic compounds in the urine of patients with cervical cancer. Test concept for timely screening	204.353
bicyclo[7.2.0]undec-4-ene, 4,11,11-trimethyl-8-methylene-,[1r-(1r*,4z,9s*)]-	118-65-0	C15H24	Polycyclic, Alkene	Cervical		Identified in cancer patients (May also be found in healthy controls)	Leon Martinez et al., 2021	Identification of volatile organic compounds in the urine of patients with cervical cancer. Test concept for timely screening	204.353
eudesma-4(14),11-diene		C15H24	Polycyclic, Alkene	Cervical		Identified in cancer patients (May also be found in healthy controls)	Leon Martinez et al., 2021	Identification of volatile organic compounds in the urine of patients with cervical cancer. Test concept for timely screening	204.353
(6e)-7,11-dimethyl-3-methylidenedodeca-1,6,10-triene	77129-48-7	C15H24	Alkene	Breast/bone metastisis		Differentially expressed compounds in cancerous mice given pitavastatin treatment	Wang et al., 2019	Pitavastatin slows tumor progression and alters urine-derived volatile organic compounds through the mevalonate pathway	204.353
2,4-ditert-butylphenol	96-76-4	C14H22O	Phenol	Breast		Identified as significant in model of breast cancer and Pitavastatin treatment	Grocki et al., 2022	Chemometric Analysis of Urinary Volatile Organic Compounds to Monitor the Efficacy of Pitavastatin Treatments on Mammary Tumor Progression over Time	206.325
2,4-di-tert-butylphenol	96-76-4	C14H22O	Phenol	Breast		Compounds identified as significantly different between early stage (week 1) and later stage (week 3) cancer	Woollam et al., 2023	Tracking the Progression of Triple Negative Mammary Tumors over Time by Chemometric Analysis of Urinary Volatile Organic Compounds	206.325
1h-cycloprop[e]azulene, decahydro-1,1,4,7-tetramethyl-	28580-43-0	C15H26	Polycyclic, Alkane	Cervical		Identified in cancer patients (May also be found in healthy controls)	Leon Martinez et al., 2021	Identification of volatile organic compounds in the urine of patients with cervical cancer. Test concept for timely screening	206.369
2,6,10,10-tetramethyltricyclo[5.4.0.02,9]undecane		C15H26	Polycyclic, Alkane	Cervical		Identified in cancer patients (May also be found in healthy controls)	Leon Martinez et al., 2021	Identification of volatile organic compounds in the urine of patients with cervical cancer. Test concept for timely screening	206.369
8,8,9-trimethyl-deca-3,5-diene-2,7-dione		C13H20O2	Ketone	Breast		Identified as significant in model of breast cancer and Pitavastatin treatment	Grocki et al., 2022	Chemometric Analysis of Urinary Volatile Organic Compounds to Monitor the Efficacy of Pitavastatin Treatments on Mammary Tumor Progression over Time	208.298
8,8,9-trimethyl-deca-3,5-diene-2,7-dione		C13H20O2	Ketone	Breast		Compounds identified as significantly different between early stage (week 1) and later stage (week 3) cancer	Woollam et al., 2023	Tracking the Progression of Triple Negative Mammary Tumors over Time by Chemometric Analysis of Urinary Volatile Organic Compounds	208.298
5-isobutyl-2-isopropyl-3-methoxypyrazine		C12H20N2O	Heterocyclic, Ether, Aromatic	Breast		Identified as significant in model of breast cancer and Pitavastatin treatment	Grocki et al., 2022	Chemometric Analysis of Urinary Volatile Organic Compounds to Monitor the Efficacy of Pitavastatin Treatments on Mammary Tumor Progression over Time	208.302
3-methoxy-2-(1-methylethyl)-5-(2-methylpropyl)pyrazine		C12H20N2O	Heterocyclic, Ether	Breast		Compounds identified as significantly different between early stage (week 1) and later stage (week 3) cancer	Woollam et al., 2023	Tracking the Progression of Triple Negative Mammary Tumors over Time by Chemometric Analysis of Urinary Volatile Organic Compounds	208.302
2-methyl-4-(2,6,6-trimethylcyclohex-1-enyl)but-2-en-1-ol		C14H24O	Cyclic, Alcohol	Cervical		Identified in cancer patients (May also be found in healthy controls)	Leon Martinez et al., 2021	Identification of volatile organic compounds in the urine of patients with cervical cancer. Test concept for timely screening	208.341
4-nitrophenyl butyrate	2635-84-9	C10H11NO4	Ester, Aromatic, Nitro	Breast	Downregulated	Compounds identified as potential biomarkers for model of cancer	Li et al., 2023	Development of a headspace-solid phase microextraction gas chromatography-high resolution mass spectrometry method for analyzing volatile organic compounds in urine: Application in breast cancer biomarker discovery	209.199
(2-ethyl-3-hydroxyhexyl) 2-methylpropanoate	74367-31-0	C12H24O3	Ester, Alcohol	Breast		Identified as significant in model of breast cancer and Pitavastatin treatment	Grocki et al., 2022	Chemometric Analysis of Urinary Volatile Organic Compounds to Monitor the Efficacy of Pitavastatin Treatments on Mammary Tumor Progression over Time	216.317
propanoic acid, 2-methyl-, 2-ethyl-3-hydroxyhexyl ester	74367-31-0	C12H24O3	Ester, Alcohol	Breast		Compounds identified as significantly different between early stage (week 1) and later stage (week 3) cancer	Woollam et al., 2023	Tracking the Progression of Triple Negative Mammary Tumors over Time by Chemometric Analysis of Urinary Volatile Organic Compounds	216.317
dodecanal	112-54-9	C12H24O3	Aldehyde	Bladder		Used in study based on previous research	Zhu et al., 2019	Optical sensory arrays for the detection of urinary bladder cancer-related volatile organic compounds	216.317
6-ethoxy-2,2,4-trimethyl-1h-quinoline	91-53-2	C14H19NO	Heterocyclic, Polycyclic, Ether	Breast		Identified as significant in model of breast cancer and Pitavastatin treatment	Grocki et al., 2022	Chemometric Analysis of Urinary Volatile Organic Compounds to Monitor the Efficacy of Pitavastatin Treatments on Mammary Tumor Progression over Time	217.309
2-[3-(2,4-dimethylphenyl)propyl]oxolane	1000215-25-2	C15H22O	Unknown	Prostate	Downregulated	Identified as significant in model of Prostate Cancer diagnosis and risk assessment	Gao et al., 2019	Application of Urinary Volatile Organic Compounds (VOCs) for the Diagnosis of Prostate Cancer'	218.336
cyclohexanone, 3-ethenyl-3-methyl-2-(1-methylethenyl)-6-(1-methylethylidene)-, trans-		C15H22O	Cyclic, Ketone	Cervical		Identified in cancer patients (May also be found in healthy controls)	Leon Martinez et al., 2021	Identification of volatile organic compounds in the urine of patients with cervical cancer. Test concept for timely screening	218.336
(4r,4as,6r)-4,4a-dimethyl-6-prop-1-en-2-yl-3,4,5,6,7,8-hexahydronaphthalen-2-one	4674-50-4	C15H22O	Cyclic, Ketone	Bladder	Increased 7.8 fold	Compounds identified as sigificantly different from control group	Ligor et al., 2022	Analysis of VOCs in Urine Samples Directed towards of Bladder Cancer Detection	218.336
decahydro-4,8,8-trimethyl-1,4-methanoazulene-9-carbaldehyde	79645-28-6	C15H24O	Polycyclic, Aldehyde	Cervical		Identified in cancer patients (May also be found in healthy controls)	Leon Martinez et al., 2021	Identification of volatile organic compounds in the urine of patients with cervical cancer. Test concept for timely screening	220.352
2,7,7,10-tetramethyl-3-oxatetracyclo[7.3.0.02,4.06,8]dodecane		C15H24O	Polycyclic, Heterocyclic	Cervical		Identified in cancer patients (May also be found in healthy controls)	Leon Martinez et al., 2021	Identification of volatile organic compounds in the urine of patients with cervical cancer. Test concept for timely screening	220.352
1-hydroxy-1,7-dimethyl-4-isopropyl-2,7-cyclodecadiene	198991-79-6	C15H26O	Cyclic, Alcohol	Cervical		Identified in cancer patients (May also be found in healthy controls)	Leon Martinez et al., 2021	Identification of volatile organic compounds in the urine of patients with cervical cancer. Test concept for timely screening	222.368
3,7,11-trimethyl-1,6,10-dodecatrien-3-ol	7212-44-4	C15H26O	Alcohol	Bladder	Increased 4.7 fold	Compounds identified as sigificantly different from control group	Ligor et al., 2022	Analysis of VOCs in Urine Samples Directed towards of Bladder Cancer Detection	222.368
(4-acetyloxy-3-methoxyphenyl) acetate	75514-03-3	C11H12O5	Phenol, Ester	Breast		Identified as significant in model of breast cancer and Pitavastatin treatment	Grocki et al., 2022	Chemometric Analysis of Urinary Volatile Organic Compounds to Monitor the Efficacy of Pitavastatin Treatments on Mammary Tumor Progression over Time	224.21
8-pentadecanone	818-23-5	C15H30O	Ketone	Breast		Compounds identified as significantly different between early stage (week 1) and later stage (week 3) cancer	Woollam et al., 2023	Tracking the Progression of Triple Negative Mammary Tumors over Time by Chemometric Analysis of Urinary Volatile Organic Compounds	226.399
hexadecane	544-76-3	C16H34	Alkane	Bladder		Compounds identified as possibility biomarkers of bladder cancer	Tyagi et al., 2021	Urinary Volatiles and Chemical Characterisation for the Non-Invasive Detection of Prostate and Bladder Cancers	226.443
hexadecane	544-76-3	C16H34	Alkane	Breast		Compounds identified as significantly different between early stage (week 1) and later stage (week 3) cancer	Woollam et al., 2023	Tracking the Progression of Triple Negative Mammary Tumors over Time by Chemometric Analysis of Urinary Volatile Organic Compounds	226.443
phenol, 4,4'-(1-methylethylidene)bis-	29348	C15H16O2	Phenol	Cervical		Identified in cancer patients (May also be found in healthy controls)	Leon Martinez et al., 2021	Identification of volatile organic compounds in the urine of patients with cervical cancer. Test concept for timely screening	228.288
2(1h)-naphthalenone, octahydro-4a-phenyl-, trans-		C16H20O	Polycyclic, Ketone, Aromatic	Cervical		Identified in cancer patients (May also be found in healthy controls)	Leon Martinez et al., 2021	Identification of volatile organic compounds in the urine of patients with cervical cancer. Test concept for timely screening	228.332
2-chloro-4-(2,3-dichlorophenyl) benzoic acid	1261913-68-1	C13H7ClO2	Aromatic, Carboxylic Acid, Organohalide	Breast	Downregulated	Compounds identified as potential biomarkers for model of cancer	Li et al., 2023	Development of a headspace-solid phase microextraction gas chromatography-high resolution mass spectrometry method for analyzing volatile organic compounds in urine: Application in breast cancer biomarker discovery	230.649
2,6-ditert-butyl-4-hydroxy-4-methylcyclohexa-2,5-dien-1-one	101100-38-3	C15H22O2	Cyclic, Ketone, Alcohol	Prostate	Upregulated	Identified as significant in model of Prostate Cancer diagnosis and risk assessment	Gao et al., 2019	Application of Urinary Volatile Organic Compounds (VOCs) for the Diagnosis of Prostate Cancer'	234.335
3,5-ditert-butyl-4-hydroxybenzaldehyde	1620-98-0	C15H22O2	Aromatic	Breast		Identified as significant in model of breast cancer and Pitavastatin treatment	Grocki et al., 2022	Chemometric Analysis of Urinary Volatile Organic Compounds to Monitor the Efficacy of Pitavastatin Treatments on Mammary Tumor Progression over Time	234.335
3,5-di-tert-butyl-4-hydroxybenzaldehyde	1620-98-0	C15H22O2	Aldehyde, Phenol	Breast		Compounds identified as significantly different between early stage (week 1) and later stage (week 3) cancer	Woollam et al., 2023	Tracking the Progression of Triple Negative Mammary Tumors over Time by Chemometric Analysis of Urinary Volatile Organic Compounds	234.335
6-(hydroxymethyl)-2,6,8-trimethyltricyclo[5.3.1.01,5]undecan-8-ol	62600-05-9	C15H26O2	Polycyclic, Alcohol	Cervical		Identified in cancer patients (May also be found in healthy controls)	Leon Martinez et al., 2021	Identification of volatile organic compounds in the urine of patients with cervical cancer. Test concept for timely screening	238.367
11-hexadecen-1-ol	56683-54-6	C16H32O	Alcohol	Bladder	Found only in cancer group	Compounds occuring only in cancer group	Ligor et al., 2022	Analysis of VOCs in Urine Samples Directed towards of Bladder Cancer Detection	240.426
(3r,3as,5ar,9br)-3,5a,9-trimethyl-3a,4,5,9b-tetrahydro-3h-benzo[g][1]benzofuran-2,8-dione		C15H18O3	Heterocyclic, Polycycllic, Ketone	Breast		Identified as significant in model of breast cancer and Pitavastatin treatment	Grocki et al., 2022	Chemometric Analysis of Urinary Volatile Organic Compounds to Monitor the Efficacy of Pitavastatin Treatments on Mammary Tumor Progression over Time	246.303
acetate, (2,5,5,8a-tetramethyl-1,2,3,5,6,7,8,8a-octahydro-1-naphthalenyl) ester	101447-86-3	C16H26O2	Ester, Polycyclic	Prostate		Compound identified as statistically significant between cancer and control groups	Riccio et al., 2023	Differences in the Volatilomic Urinary Biosignature of Prostate Cancer Patients as a Feasibility Study for the Detection of Potential Biomarkers	250.378
3,7-dimethyloct-6-enyl hexanoate	10580-25-3	C16H30O2	Ester	Breast/bone metastisis		Differentially expressed compounds in cancerous mice given placebo treatment	Wang et al., 2019	Pitavastatin slows tumor progression and alters urine-derived volatile organic compounds through the mevalonate pathway	254.409
dodecyl 2-sulfanylacetate	3746-39-2	C14H28O2S	Ester, Organosulfur	Cervical		Identified in cancer patients (May also be found in healthy controls)	Leon Martinez et al., 2021	Identification of volatile organic compounds in the urine of patients with cervical cancer. Test concept for timely screening	260.437
1-chlorohexadecane	1081180	C16H33Cl	Organohalide	Cervical		Identified in cancer patients (May also be found in healthy controls)	Leon Martinez et al., 2021	Identification of volatile organic compounds in the urine of patients with cervical cancer. Test concept for timely screening	260.888
4-(2,2,4-trimethyl-3h-chromen-4-yl)phenol	000472-41-3	C18H20O2	Phenol, heterocyclic, polycyclic, aromatic	Prostate	Downregulated	Identified as significant in model of Prostate Cancer diagnosis and risk assessment	Gao et al., 2019	Application of Urinary Volatile Organic Compounds (VOCs) for the Diagnosis of Prostate Cancer'	268.353
nonadecane	629-92-5	C19H40	Alkane	Cervical		Identified in cancer patients (May also be found in healthy controls)	Leon Martinez et al., 2021	Identification of volatile organic compounds in the urine of patients with cervical cancer. Test concept for timely screening	268.523
pentadecane, 2,6,10,14-tetramethyl-	1921-70-6	C19H40	Alkane	Bladder		Compounds identified as possibility biomarkers of bladder cancer	Tyagi et al., 2021	Urinary Volatiles and Chemical Characterisation for the Non-Invasive Detection of Prostate and Bladder Cancers	268.523
2-isopropenyl-4,4,7a-trimethyl-2,4,5,6,7,7a-hexahydro-benzofuran-6-ol		C18H22O2	Polycyclic, Heterocyclic, Ketone, Aromatic	Cervical		Identified in cancer patients (May also be found in healthy controls)	Leon Martinez et al., 2021	Identification of volatile organic compounds in the urine of patients with cervical cancer. Test concept for timely screening	270.368
17-chloro-7-heptadecyne	56554-75-7	C17H31Cl	Organohalide, Alkyne	Cervical		Identified in cancer patients (May also be found in healthy controls)	Leon Martinez et al., 2021	Identification of volatile organic compounds in the urine of patients with cervical cancer. Test concept for timely screening	270.883
(17β)-estra-1,3,5(10)-triene-3,17-diol	000050-28-2	C18H24O2	Polycyclic, Phenol, Alcohol	Prostate	Downregulated	Identified as significant in model of Prostate Cancer diagnosis and risk assessment	Gao et al., 2019	Application of Urinary Volatile Organic Compounds (VOCs) for the Diagnosis of Prostate Cancer'	272.384
ethyl à-hydroxymyristate trisiloxane	129086-73-3	C16H32O3	Siloxane	Prostate	Downregulated	Appears to be missepelled?	Gao et al., 2019	Application of Urinary Volatile Organic Compounds (VOCs) for the Diagnosis of Prostate Cancer'	272.424
(1e,3z,6e,10z,14s)-3,7,11-trimethyl-14-propan-2-ylcyclotetradeca-1,3,6,10-tetraene	1898-13-1	C20H32	Alkene	Cervical		Identified in cancer patients (May also be found in healthy controls)	Leon Martinez et al., 2021	Identification of volatile organic compounds in the urine of patients with cervical cancer. Test concept for timely screening	272.471
(e,e)-7,11,15-trimethyl-3-methylene-hexadeca-1,6,10,14-tetraene	70901-63-2	C20H32	Alkene	Cervical		Identified in cancer patients (May also be found in healthy controls)	Leon Martinez et al., 2021	Identification of volatile organic compounds in the urine of patients with cervical cancer. Test concept for timely screening	272.471
dibutyl benzene-1,2-dicarboxylate	84-74-2	C16H22O4	Ester	Breast		Identified as significant in model of breast cancer and Pitavastatin treatment	Grocki et al., 2022	Chemometric Analysis of Urinary Volatile Organic Compounds to Monitor the Efficacy of Pitavastatin Treatments on Mammary Tumor Progression over Time	278.344
dibutyl benzene-1,2-dicarboxylate	84-74-2	C16H22O4	Aromatic, Ester	Breast		Compounds identified as significantly different between early stage (week 1) and later stage (week 3) cancer	Woollam et al., 2023	Tracking the Progression of Triple Negative Mammary Tumors over Time by Chemometric Analysis of Urinary Volatile Organic Compounds	278.344
6-azaestra-1,3,5(10),6,8-pentaen-17-one, 3-methoxy-	5144-20-7	C18H19NO2	Heterocyclic, Ether, Polycyclic, Aromatic, Ketone	Cervical		Identified in cancer patients (May also be found in healthy controls)	Leon Martinez et al., 2021	Identification of volatile organic compounds in the urine of patients with cervical cancer. Test concept for timely screening	281.352
1-(4-chlorophenyl)sulfanyl-4-nitrobenzene	024535-53-3	C12H8ClNO3S	Aromatic, Organohalide, Organosulphur, Nitro	Prostate	Upregulated	Identified as significant in model of Prostate Cancer diagnosis and risk assessment	Gao et al., 2019	Application of Urinary Volatile Organic Compounds (VOCs) for the Diagnosis of Prostate Cancer'	281.717
eicosane	112-95-8	C20H42	Alkane	Cervical		Identified in cancer patients (May also be found in healthy controls)	Leon Martinez et al., 2021	Identification of volatile organic compounds in the urine of patients with cervical cancer. Test concept for timely screening	282.549
[2,2,4-trimethyl-3-(2-methylpropanoyloxy)pentyl] 2-methylpropanoate	6846-50-0	C16H30O4	Ester	Breast		Identified as significant in model of breast cancer and Pitavastatin treatment	Grocki et al., 2022	Chemometric Analysis of Urinary Volatile Organic Compounds to Monitor the Efficacy of Pitavastatin Treatments on Mammary Tumor Progression over Time	286.407
2,2,4-trimethyl-1,3-pentanediol diisobutyrate	6846-50-0	C16H30O4	Ester	Cervical		Identified in cancer patients (May also be found in healthy controls)	Leon Martinez et al., 2021	Identification of volatile organic compounds in the urine of patients with cervical cancer. Test concept for timely screening	286.407
[2,2,4-trimethyl-3-(2-methylpropanoyloxy)pentyl] 2-methylpropanoate	6846-50-0	C16H30O4	Ester	Breast/bone metastisis		Differentially expressed compounds in cancerous mice given placebo treatment	Wang et al., 2019	Pitavastatin slows tumor progression and alters urine-derived volatile organic compounds through the mevalonate pathway	286.407
(2e,7e,11e)-1,7,11-trimethyl-4-propan-2-ylcyclotetradeca-2,7,11-trien-1-ol	25269-17-4	C20H34O	Cyclic, Alcohol	Cervical		Identified in cancer patients (May also be found in healthy controls)	Leon Martinez et al., 2021	Identification of volatile organic compounds in the urine of patients with cervical cancer. Test concept for timely screening	290.486
5-(5,5,8a-trimethyl-2-methylidene-3,4,4a,6,7,8-hexahydro-1h-naphthalen-1-yl)-3-methylpent-1-en-3-ol	106631-38-3	C20H34O	Polycyclic, Alcohol	Cervical		Identified in cancer patients (May also be found in healthy controls)	Leon Martinez et al., 2021	Identification of volatile organic compounds in the urine of patients with cervical cancer. Test concept for timely screening	290.486
heneicosane, 3-methyl-	6418-47-9	C22H46	Alkane	Cervical		Identified in cancer patients (May also be found in healthy controls)	Leon Martinez et al., 2021	Identification of volatile organic compounds in the urine of patients with cervical cancer. Test concept for timely screening	310.603
(1s,2r,6r,8s,11s,12s,15s,16s)-5,15-dihydroxy-2,16-dimethyl-7-oxapentacyclo[9.7.0.02,8.06,8.012,16]octadec-4-ene-4-carbonitrile	13647-35-3	C20H27NO3	Polycyclic, Cyano, Alcohol, Heterocyclic	Cervical		Identified in cancer patients (May also be found in healthy controls)	Leon Martinez et al., 2021	Identification of volatile organic compounds in the urine of patients with cervical cancer. Test concept for timely screening	329.436
1-isopropenyl-4,5-dimethylbicyclo[4.3.0]nonan-5-ylmethyl phenyl sulfoxide		C21H30OS	Aromatic, Organosulfur, Polycyclic	Cervical		Identified in cancer patients (May also be found in healthy controls)	Leon Martinez et al., 2021	Identification of volatile organic compounds in the urine of patients with cervical cancer. Test concept for timely screening	330.53
pregn-4-ene-3,20-dione, 2,2-dimethyl-		C23H34O2	Polycyclic, Ketone	Cervical		Identified in cancer patients (May also be found in healthy controls)	Leon Martinez et al., 2021	Identification of volatile organic compounds in the urine of patients with cervical cancer. Test concept for timely screening	342.518
1-propylpentachlorotriphosphazene	075132-80-8	C3H7Cl5N3P3	Organophosphorus	Prostate	Upregulated	Identified as significant in model of Prostate Cancer diagnosis and risk assessment	Gao et al., 2019	Application of Urinary Volatile Organic Compounds (VOCs) for the Diagnosis of Prostate Cancer'	355.295
1,1,3,3,5,5,7,7,9,9-decamethyl-pentasiloxane	000995-83-5	C10H32O4Si5	Siloxane	Prostate	Upregulated	Identified as significant in model of Prostate Cancer diagnosis and risk assessment	Gao et al., 2019	Application of Urinary Volatile Organic Compounds (VOCs) for the Diagnosis of Prostate Cancer'	356.784
1,1,1,5,5,5-hexamethyl-3,3-bis[(trimethylsilyl)oxy]-trisiloxane	003555-47-3	C12H36O4Si5	Siloxane	Prostate	Upregulated	Identified as significant in model of Prostate Cancer diagnosis and risk assessment	Gao et al., 2019	Application of Urinary Volatile Organic Compounds (VOCs) for the Diagnosis of Prostate Cancer'	384.838
cholest-5-en-3-ol	765935-41-9	C27H46O	Alcohol, Polycyclic	Cervical		Identified in cancer patients (May also be found in healthy controls)	Leon Martinez et al., 2021	Identification of volatile organic compounds in the urine of patients with cervical cancer. Test concept for timely screening	386.657
phthalic acid, bis(7-methyloctyl) ester	020548-62-3	C26H42O4	Ester	Prostate	Upregulated	Identified as significant in model of Prostate Cancer diagnosis and risk assessment	Gao et al., 2019	Application of Urinary Volatile Organic Compounds (VOCs) for the Diagnosis of Prostate Cancer'	418.611
13-methylhentriacontane	33116-06-2	C32H66	Alkane	Cervical		Identified in cancer patients (May also be found in healthy controls)	Leon Martinez et al., 2021	Identification of volatile organic compounds in the urine of patients with cervical cancer. Test concept for timely screening	450.869
1-heptatriacotanol	105794-58-9	C37H76O	Alcohol	Cervical		Identified in cancer patients (May also be found in healthy controls)	Leon Martinez et al., 2021	Identification of volatile organic compounds in the urine of patients with cervical cancer. Test concept for timely screening	537.002
3,5,24-trimethyltetracontane	55162-61-3	C43H88	Alkane	Cervical		Identified in cancer patients (May also be found in healthy controls)	Leon Martinez et al., 2021	Identification of volatile organic compounds in the urine of patients with cervical cancer. Test concept for timely screening	605.163
unconfirmed alcohol			Alcohol	Lung		Identified as significant in model of cancer mortality	Chapman et al., 2023	GC-MS Techniques Investigating Potential Biomarkers of Dying in the Last Weeks with Lung Cancer
unconfirmed ketone			Ketone	Lung	Increased 1.757 fold	Identified as significant in model of cancer mortality	Chapman et al., 2023	GC-MS Techniques Investigating Potential Biomarkers of Dying in the Last Weeks with Lung Cancer
